# Supplementary material for: A highly efficient and reusable MCM-41-immobilized bipyridine copper(i) catalyst for the C–Se coupling of organoboronic acids with diaryl diselenides
Source: Royal Society of Chemistry journal article supplement (doi:10.1039/c4nj01687d), 2015-01-01
Supplement: c4nj01687d1.pdf [file c4nj01687d1.pdf]

## Supporting information:

### Highly efficient and reusable MCM-41-immobilized bipyridine copper catalyst for the C–Se coupling of organoboronic acids with diaryl diselenides

Hong Zhao,<sup>a,b</sup> Yuanyuan Jiang,<sup>a</sup> Qiurong Chen<sup>a</sup> and Mingzhong Cai<sup>a,\*</sup>

<sup>a</sup> *Key Laboratory of Functional Small Organic Molecule, Ministry of Education and College of Chemistry & Chemical Engineering, Jiangxi Normal University, Nanchang 330022, P. R. China*

<sup>b</sup> *School of Chemistry and Chemical Engineering, Guangdong Pharmaceutical University, Guangzhou 510006, P. R. China*

Fax: (+86)-791-8812-0388; E-mail: mzcai@jxnu.edu.cn

**<sup>1</sup>H NMR and <sup>13</sup>C NMR spectra of compounds 3a-3z.**

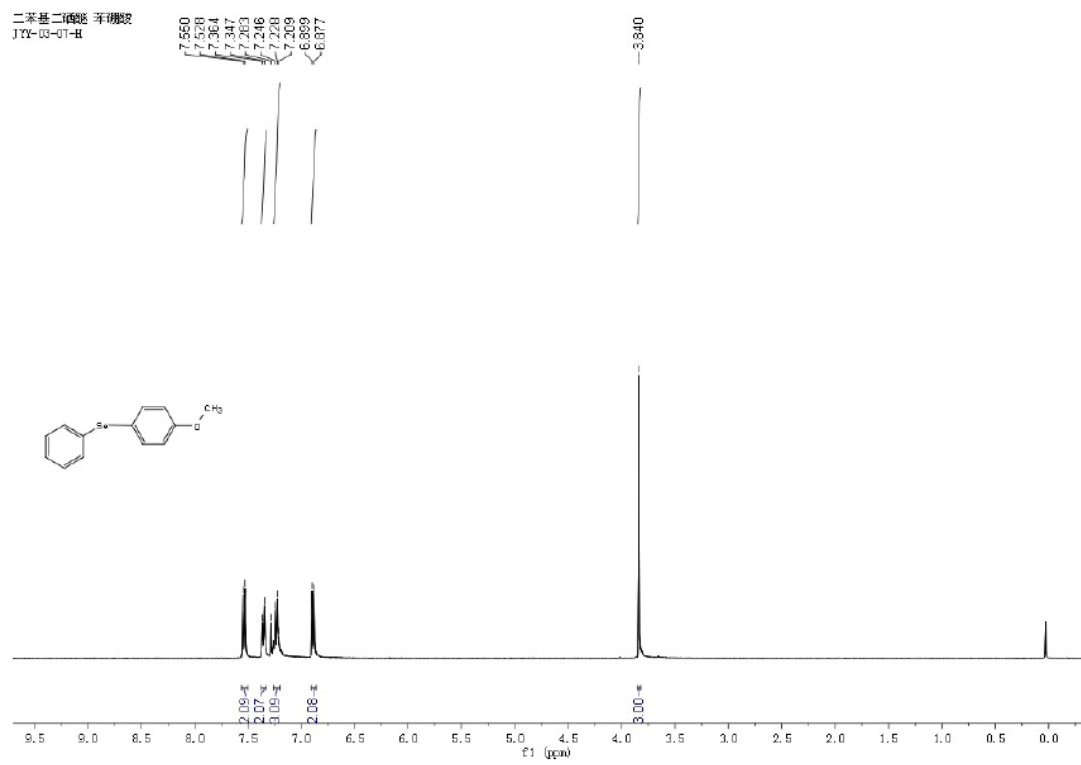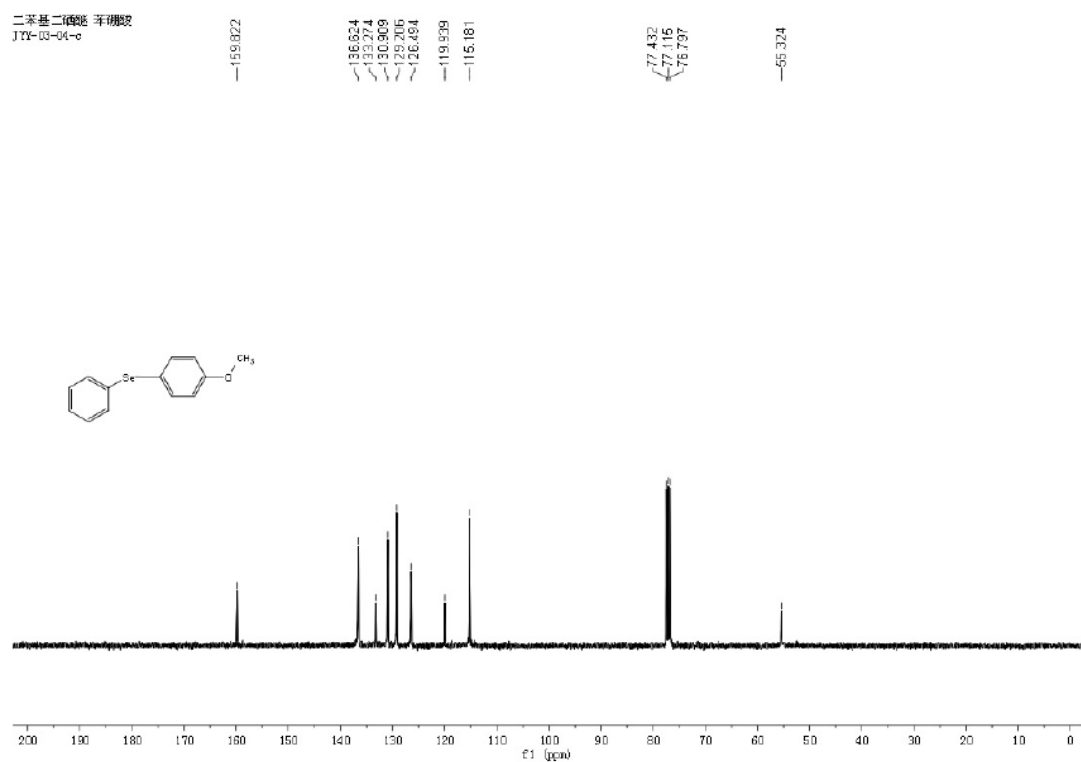

$^1\text{H}$  NMR and  $^{13}\text{C}$  NMR spectra of compound **3a**

二苯基二硒醚 苯硼酸  
JZY-03-06-H

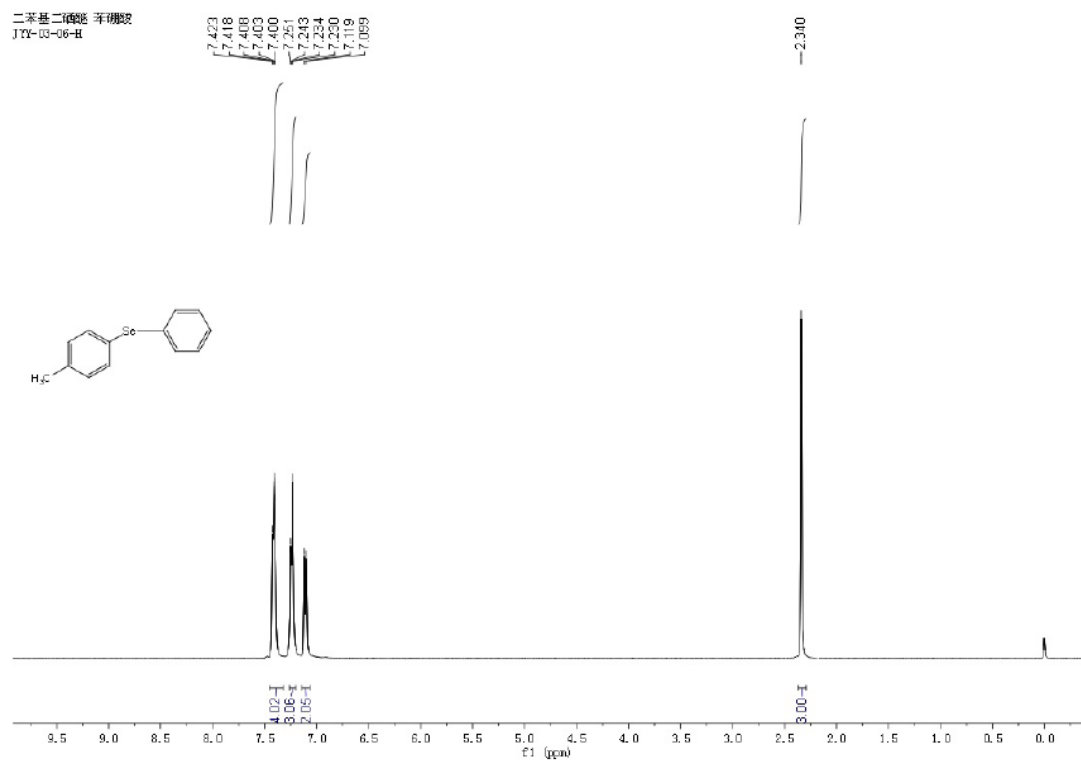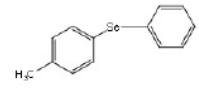

二苯基二硒醚 苯硼酸  
JZY-03-06-c

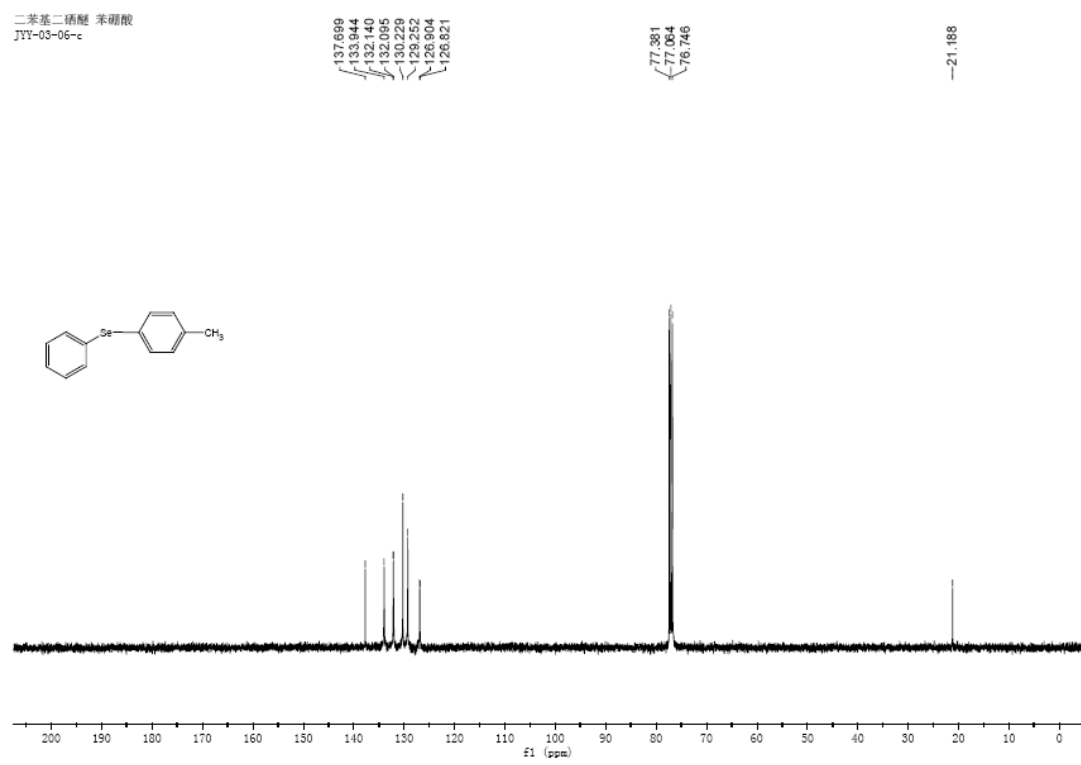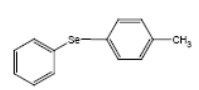

<sup>1</sup>H NMR and <sup>13</sup>C NMR spectra of compound **3b**



JY-03-12

7.523  
7.519  
7.503  
7.399  
7.366  
7.345  
7.341  
7.315  
7.309  
7.300  
7.374  
7.342  
7.321  
7.262

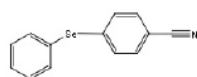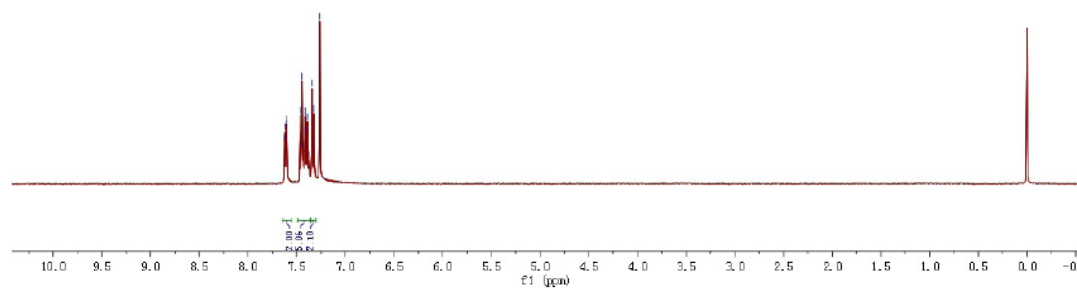

jiangyuan  
JY-03-12

140.868  
135.680  
132.398  
130.227  
129.970  
129.182  
127.993  
118.801  
109.625  
77.377  
77.059  
76.742

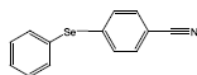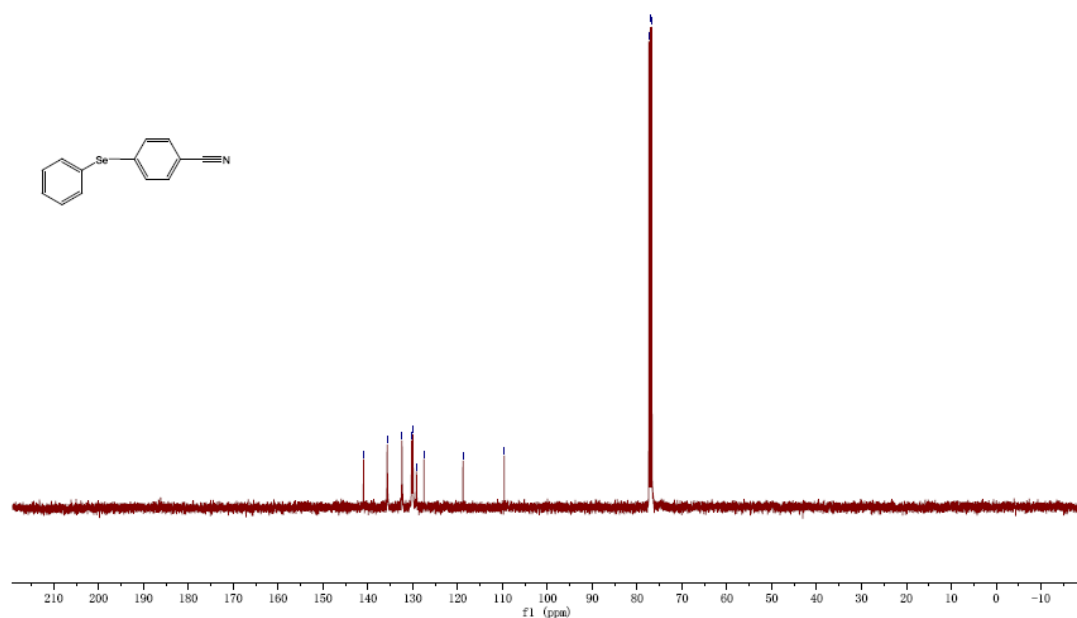

<sup>1</sup>H NMR and <sup>13</sup>C NMR spectra of compound 3d

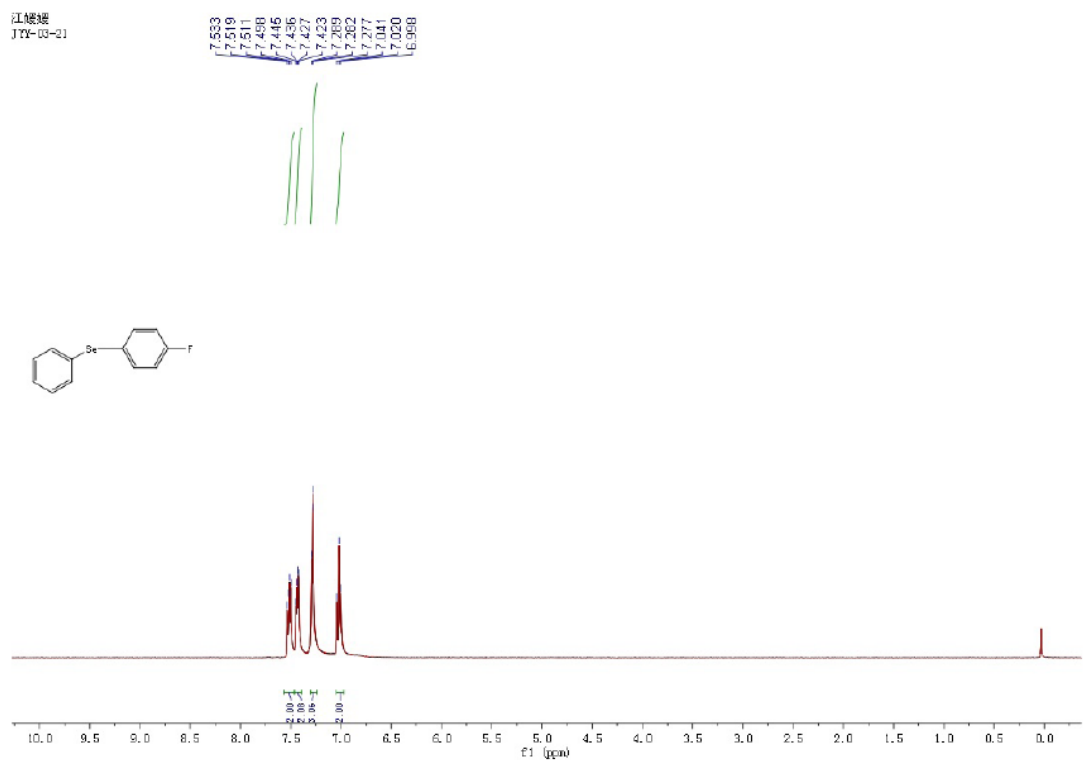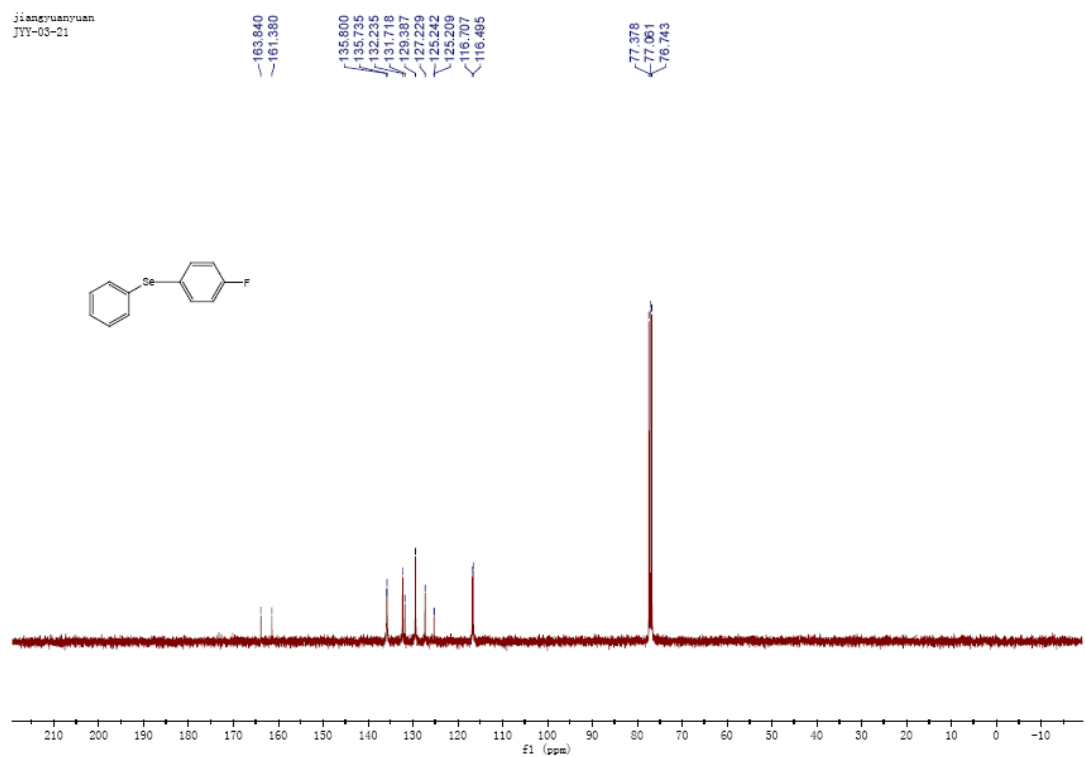

<sup>1</sup>H NMR and <sup>13</sup>C NMR spectra of compound **3e**

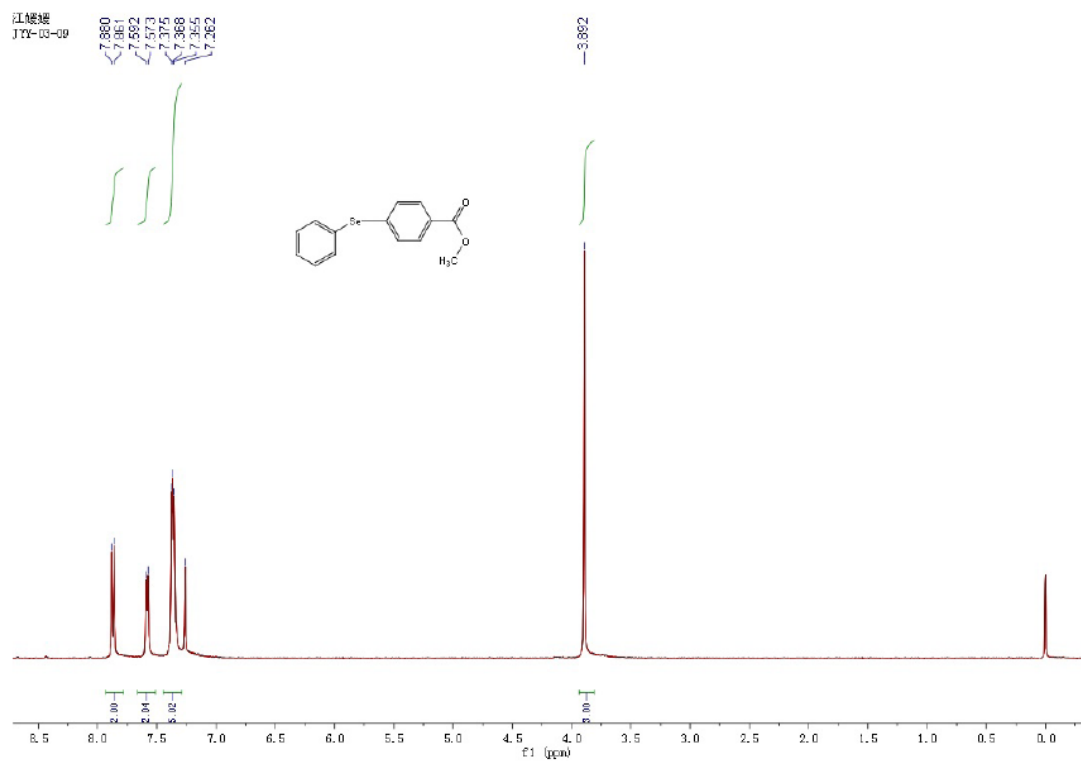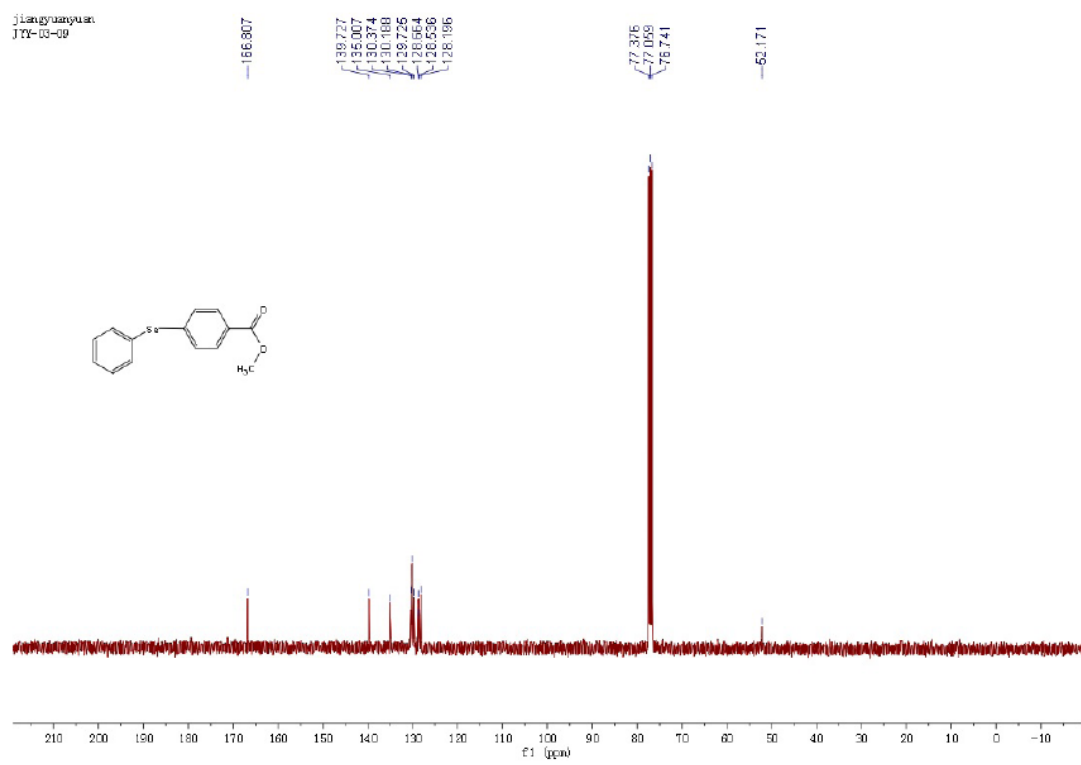

$^1\text{H}$  NMR and  $^{13}\text{C}$  NMR spectra of compound **3f**

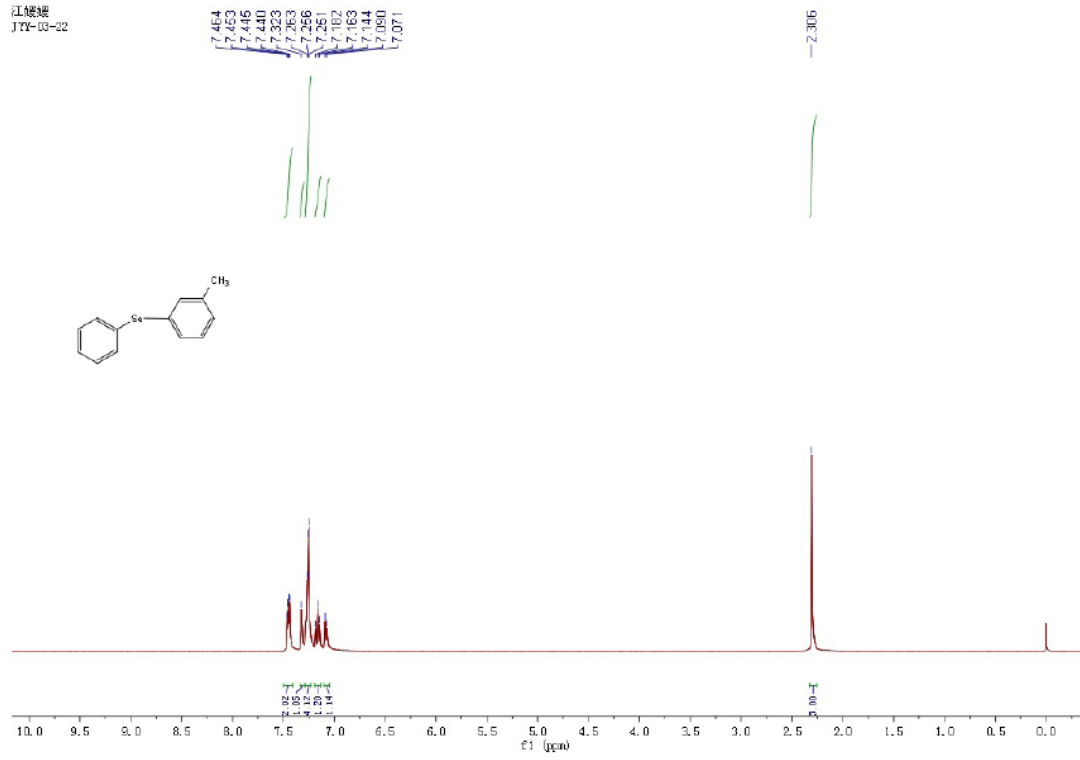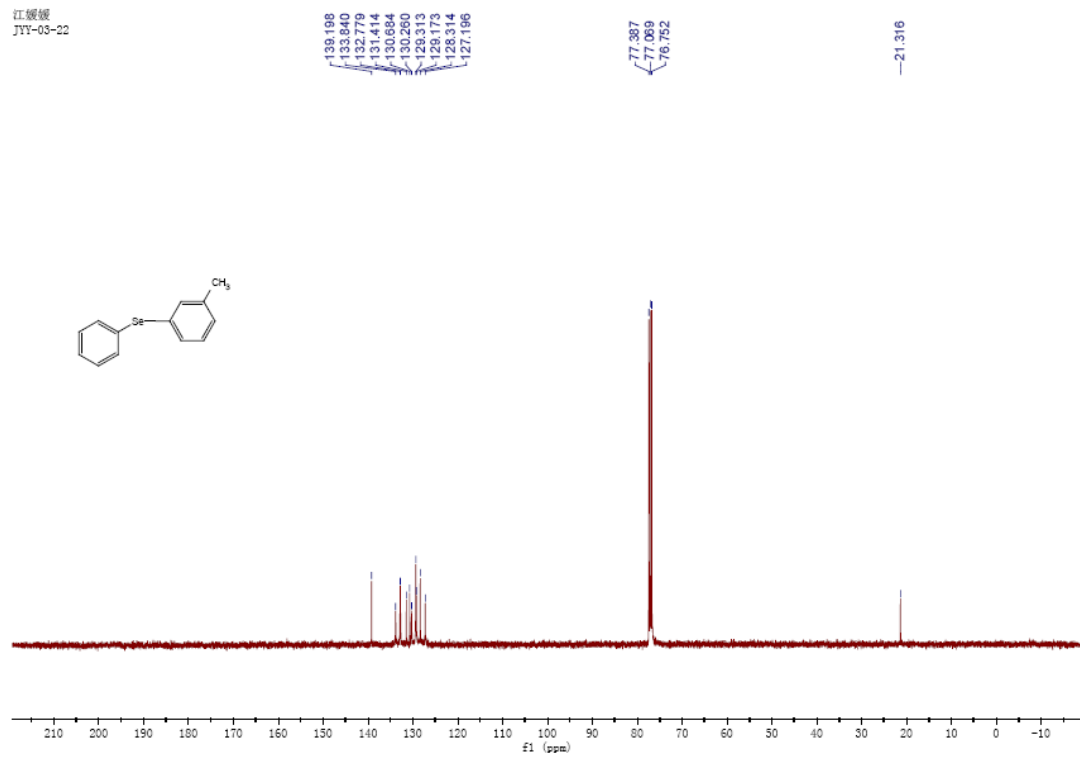

$^1\text{H}$  NMR and  $^{13}\text{C}$  NMR spectra of compound **3g**



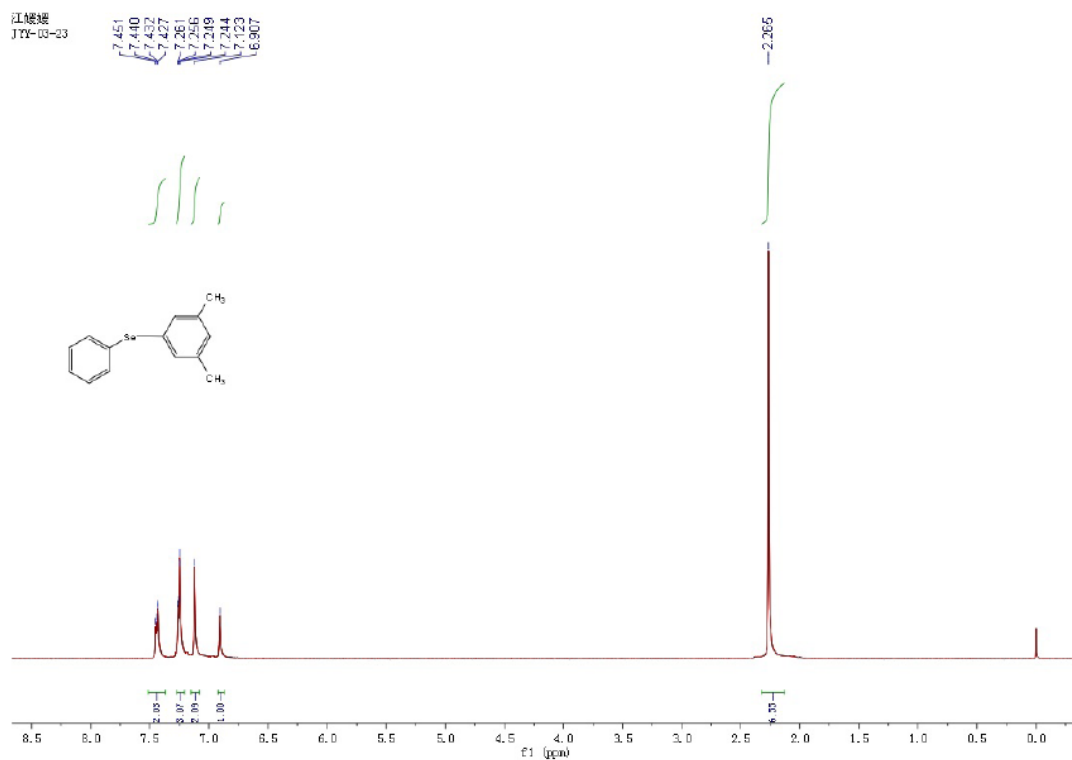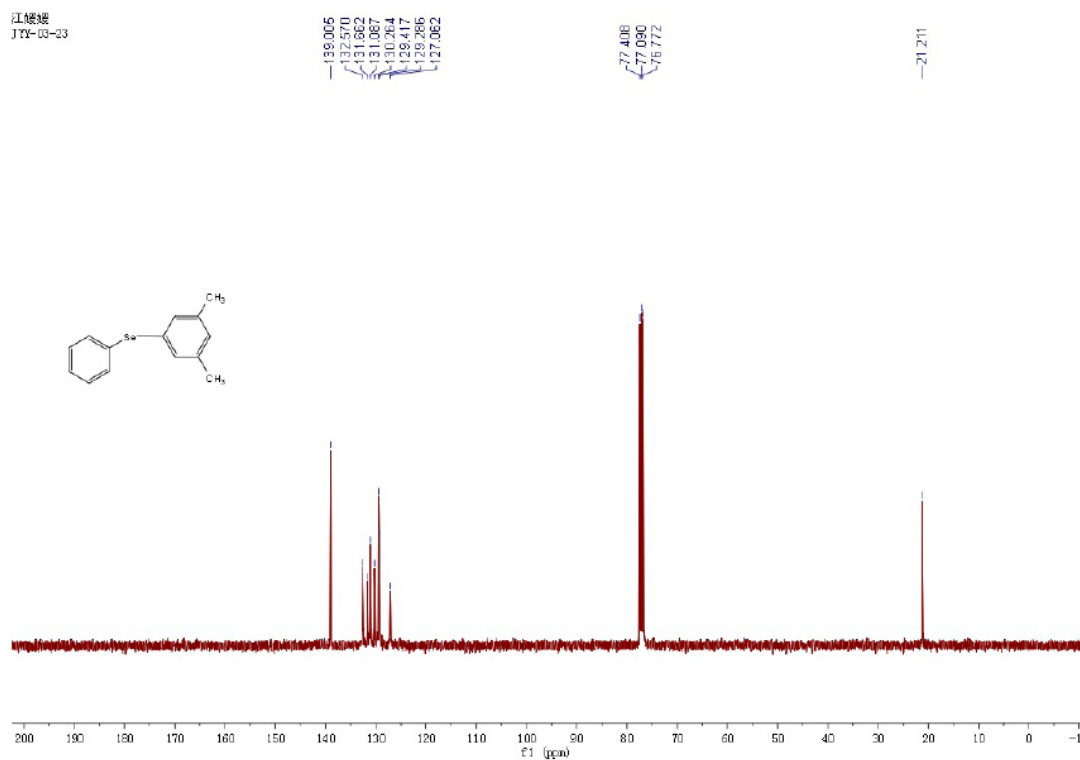

$^1\text{H}$  NMR and  $^{13}\text{C}$  NMR spectra of compound **3h**

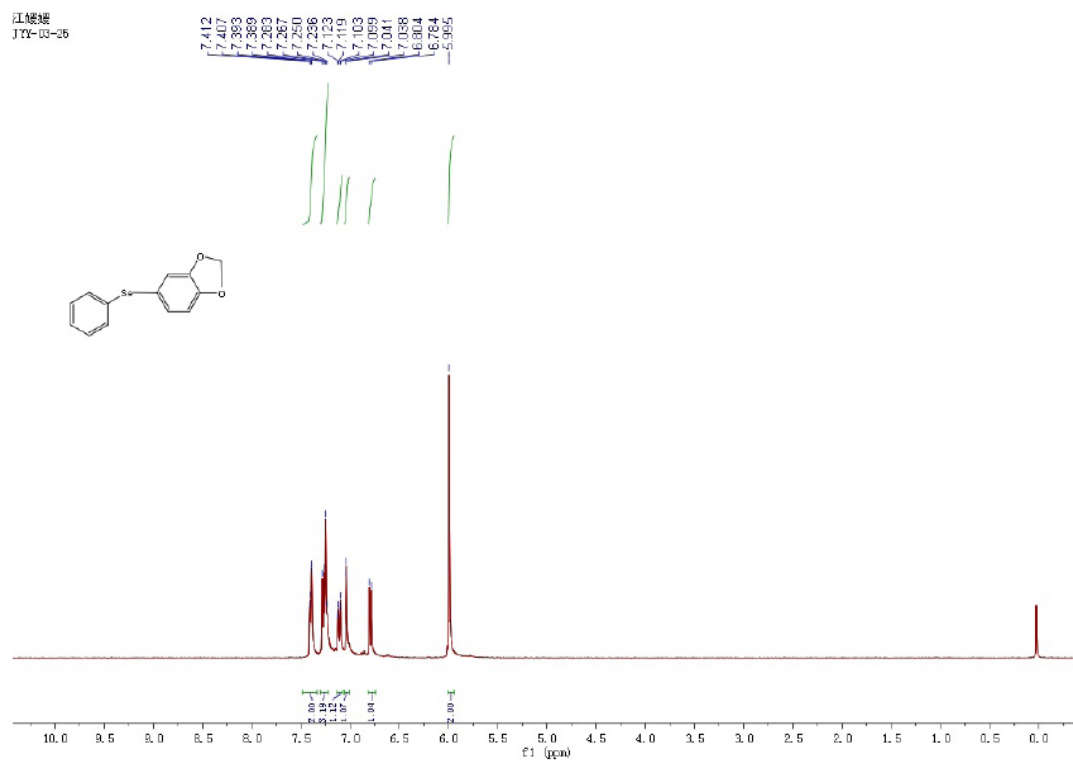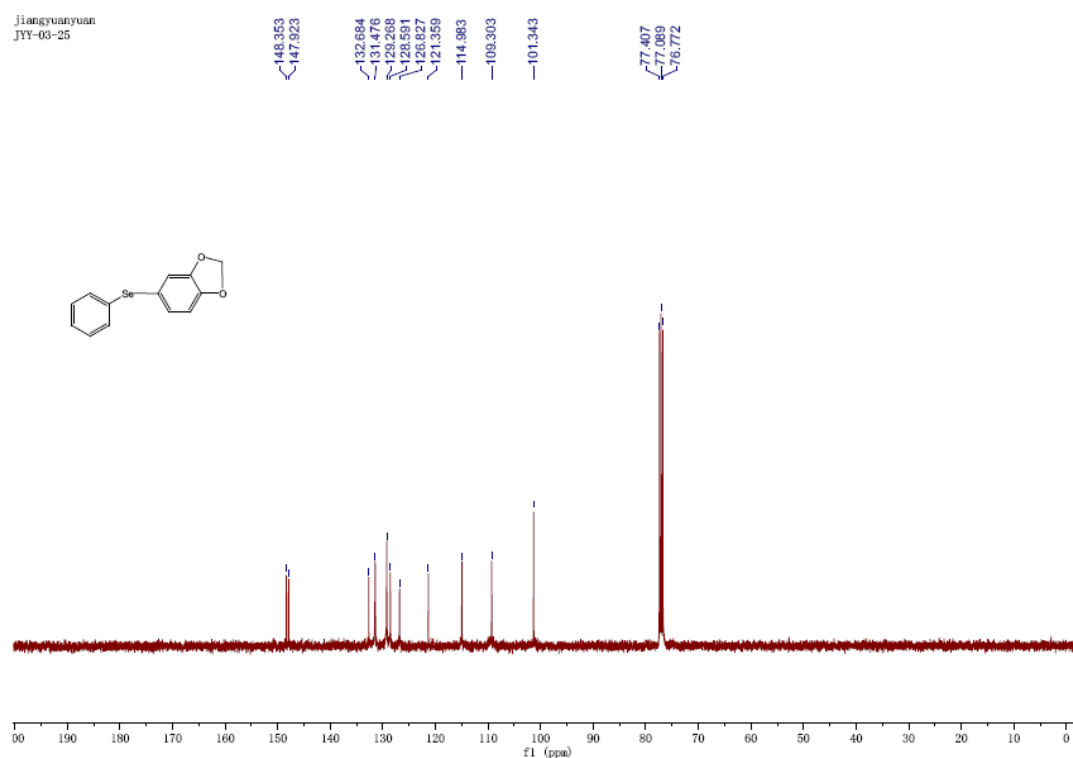

$^1\text{H}$  NMR and  $^{13}\text{C}$  NMR spectra of compound **3i**

江耀斌  
JZY-03-10

7.477  
7.468  
7.459  
7.453  
7.273  
7.264  
7.240  
7.210

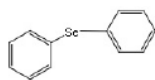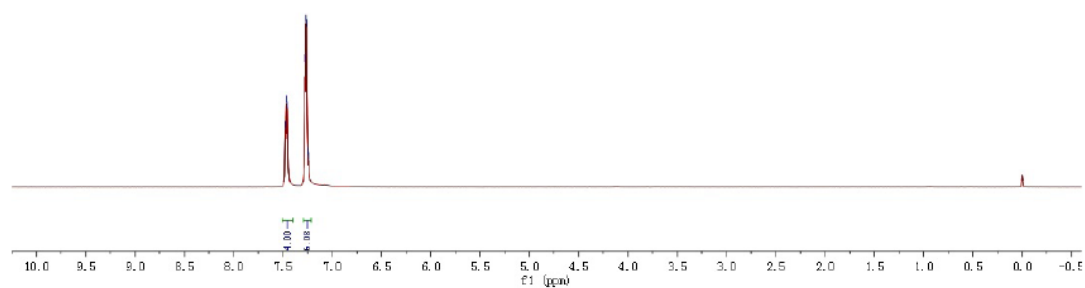

江耀斌  
JYY-03-10

133.042  
131.185  
129.377  
127.361

77.406  
77.089  
76.771

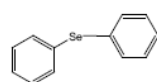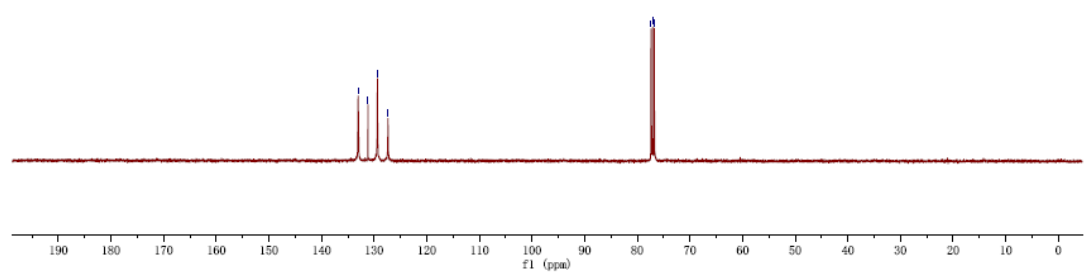

$^1\text{H}$  NMR and  $^{13}\text{C}$  NMR spectra of compound **3j**

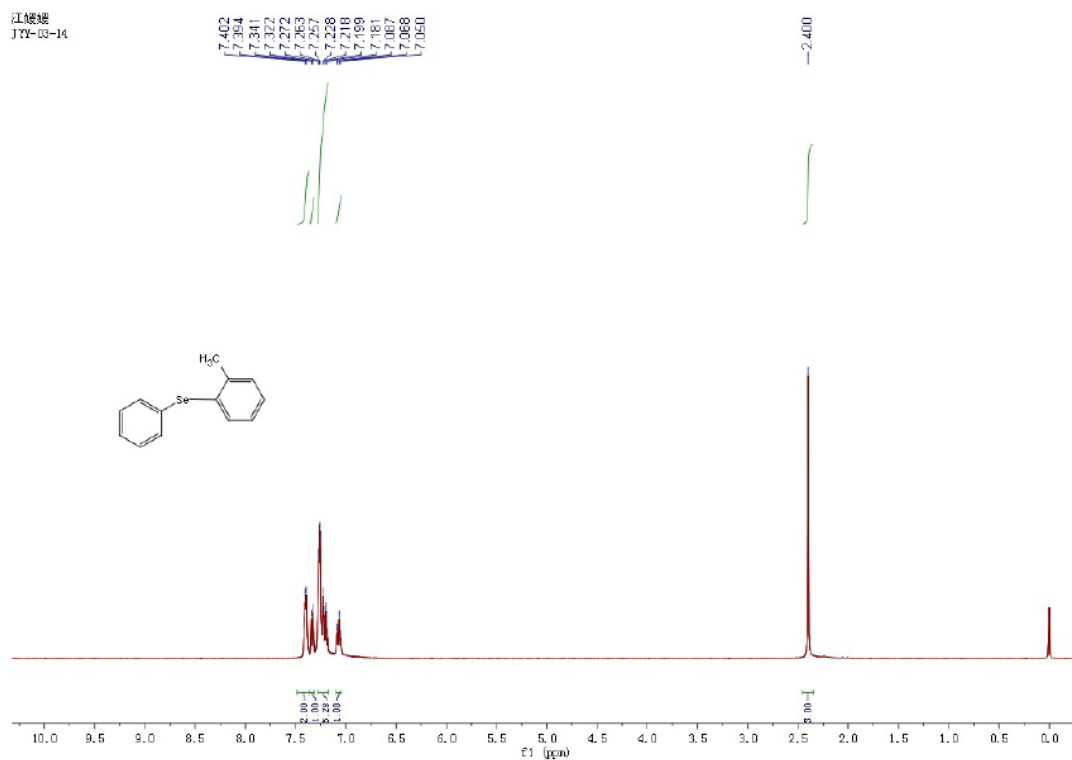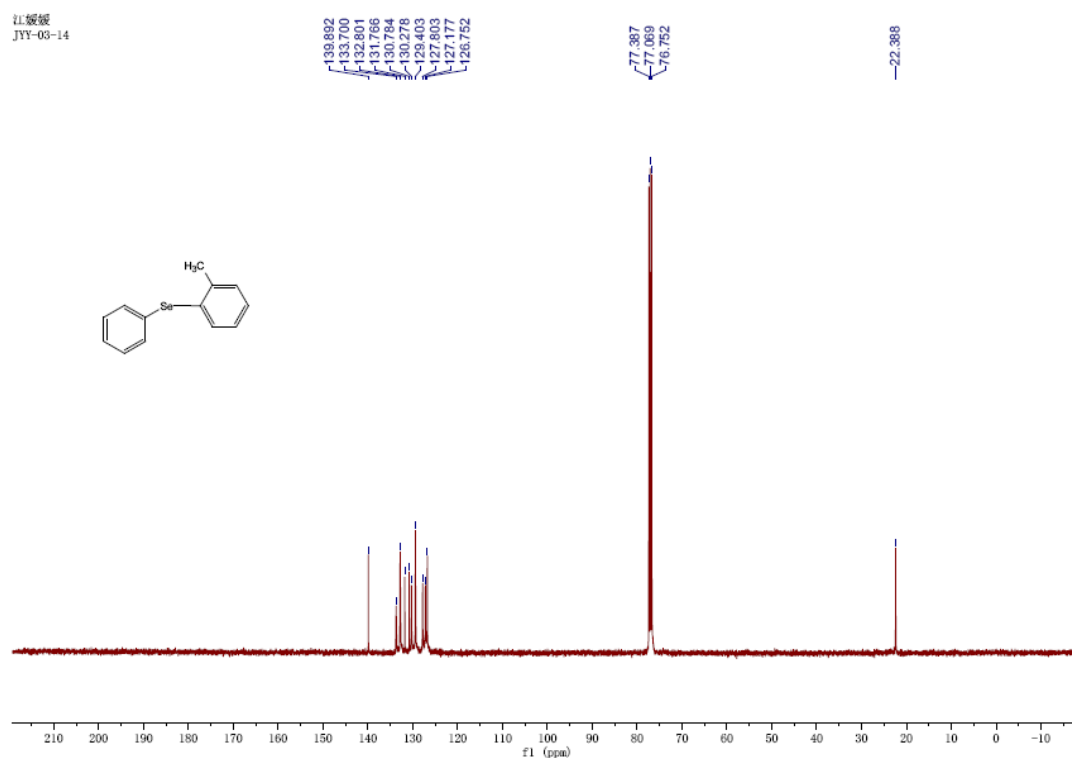

$^1\text{H}$  NMR and  $^{13}\text{C}$  NMR spectra of compound **3k**

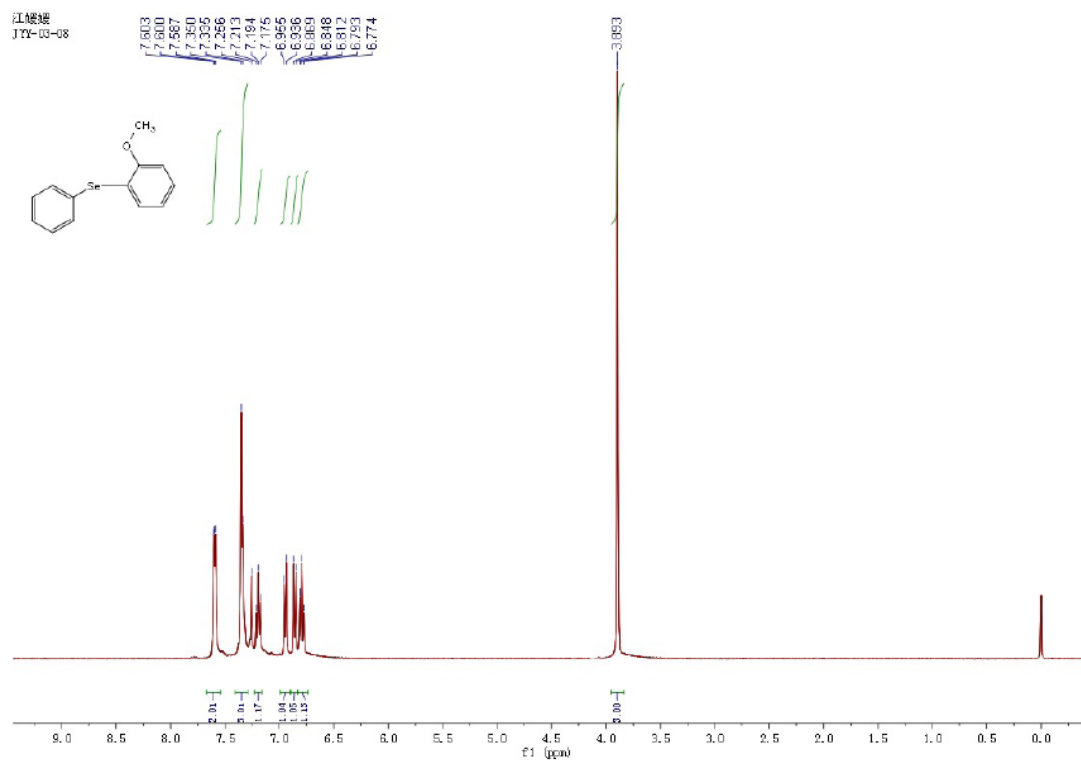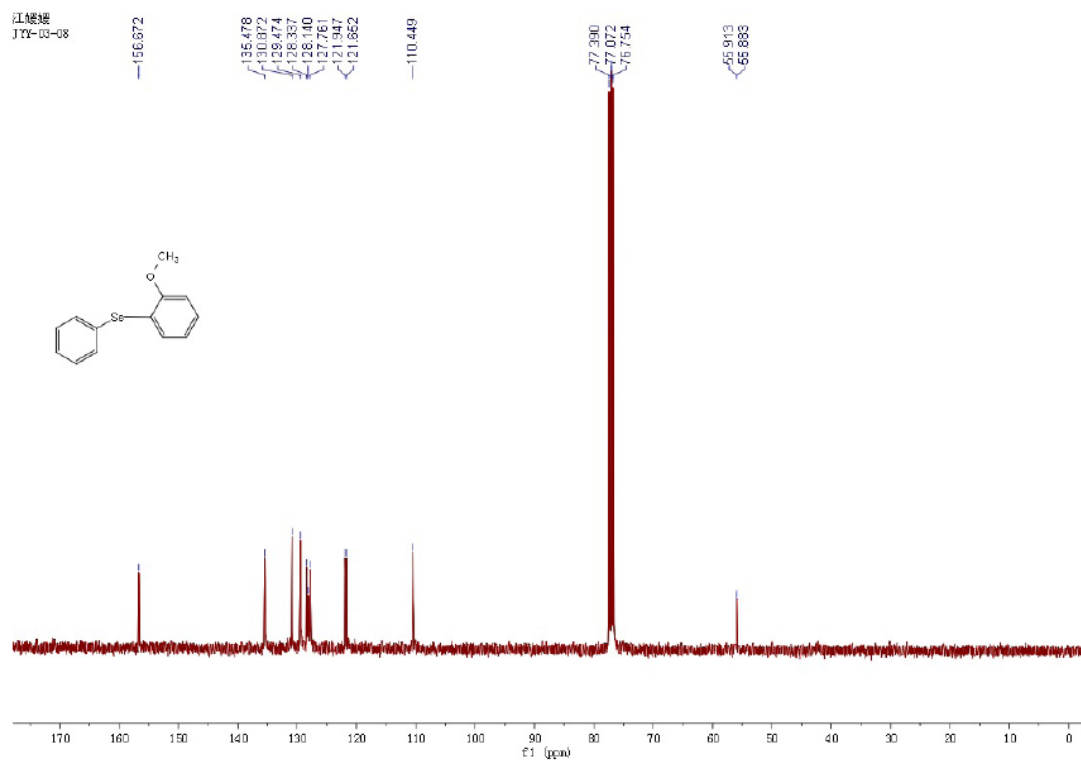

$^1\text{H}$  NMR and  $^{13}\text{C}$  NMR spectra of compound **31**

江敏媛  
JY-03-11

8.335  
8.331  
7.967  
7.947  
7.777  
7.759  
7.577  
7.560  
7.400  
7.384  
7.349  
7.330  
7.266  
7.204

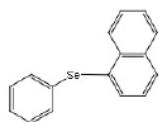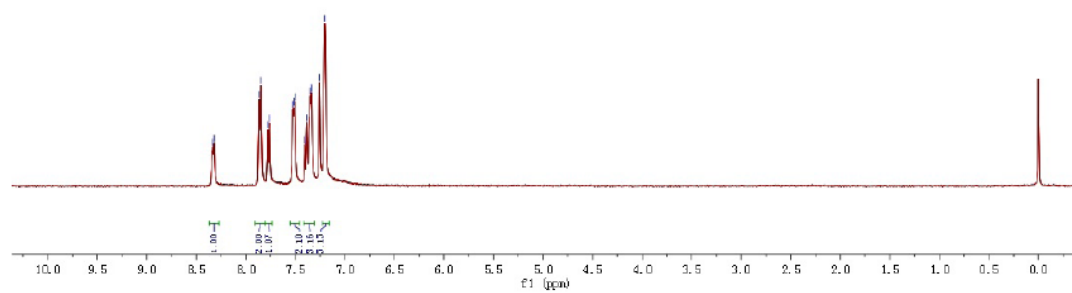

江敏媛  
JY-03-11

134.186  
134.146  
133.908  
131.766  
129.443  
129.335  
129.226  
129.203  
128.619  
127.733  
126.972  
126.853  
126.410  
126.028

77.395  
77.078  
76.760

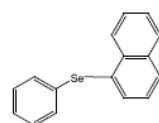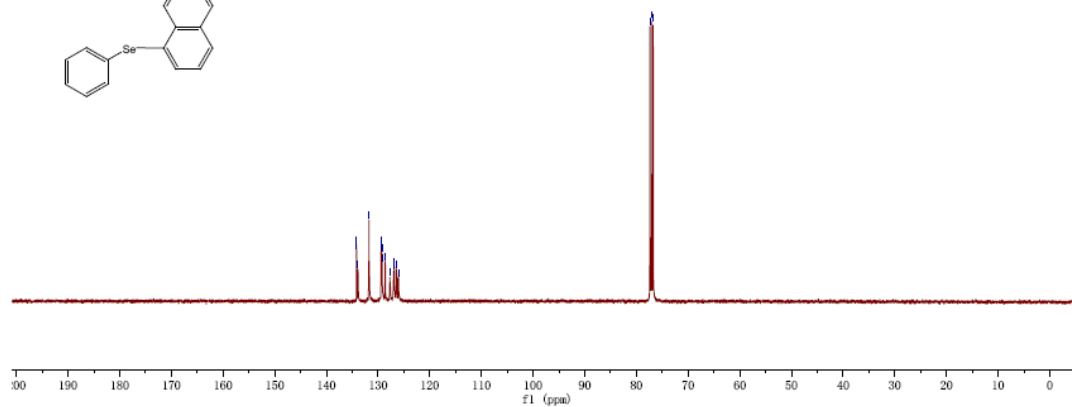

<sup>1</sup>H NMR and <sup>13</sup>C NMR spectra of compound 3m

江耀斌  
JYY-03-16

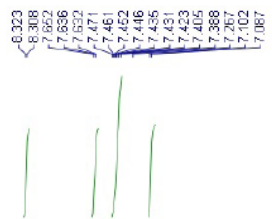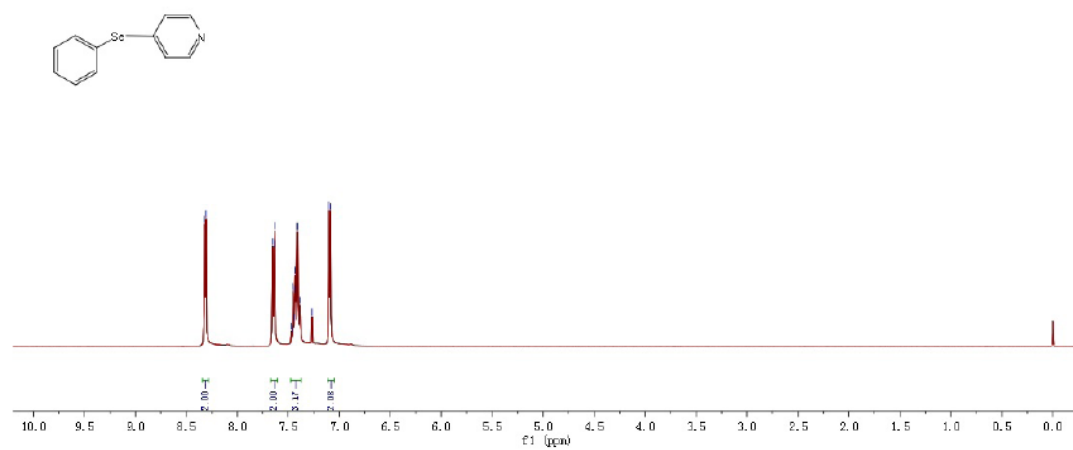

江耀斌  
JYY-03-16

149.521  
145.784  
136.306  
129.960  
129.367  
126.199  
123.926

77.443  
77.125  
76.807

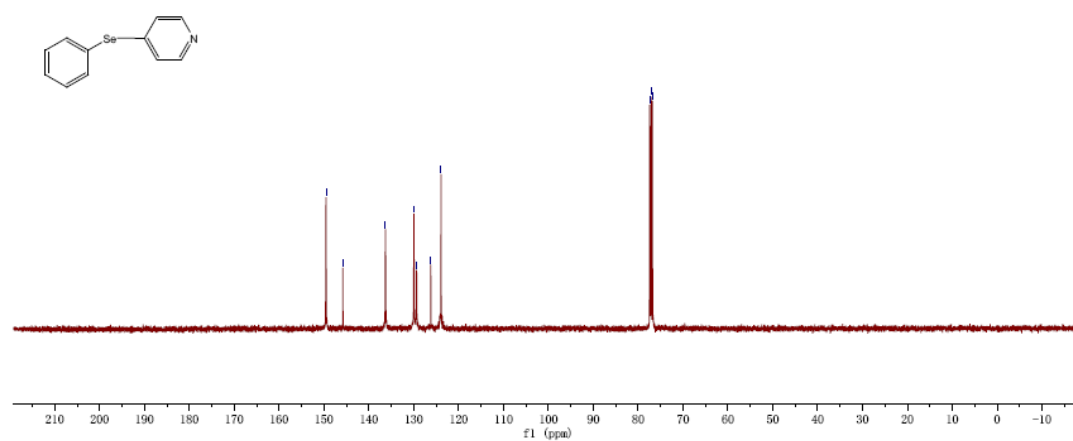

$^1\text{H}$  NMR and  $^{13}\text{C}$  NMR spectra of compound 3n

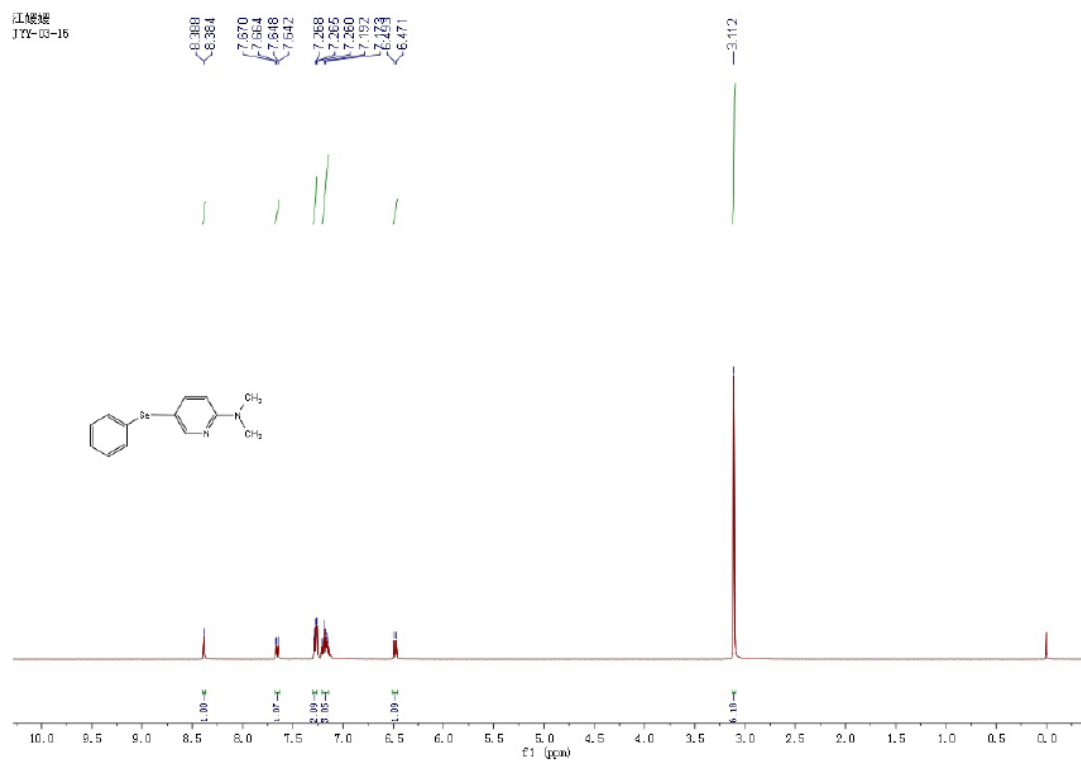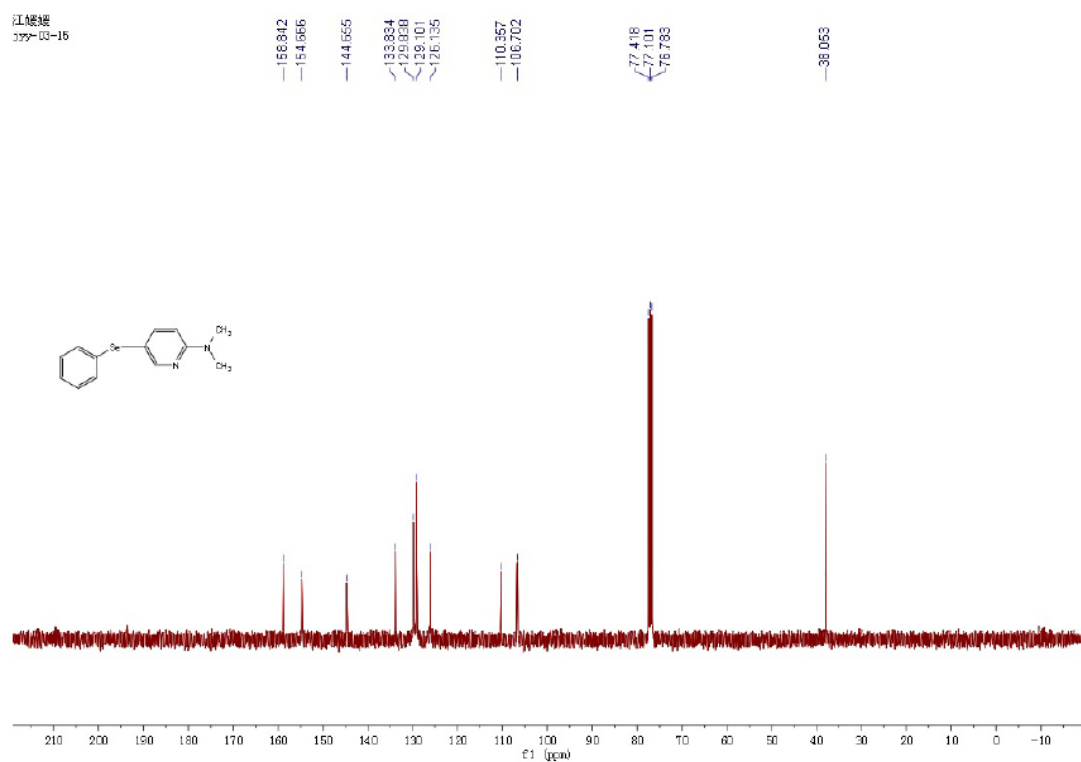

$^1\text{H}$  NMR and  $^{13}\text{C}$  NMR spectra of compound **3o**



江敏媛  
JYY-03-24

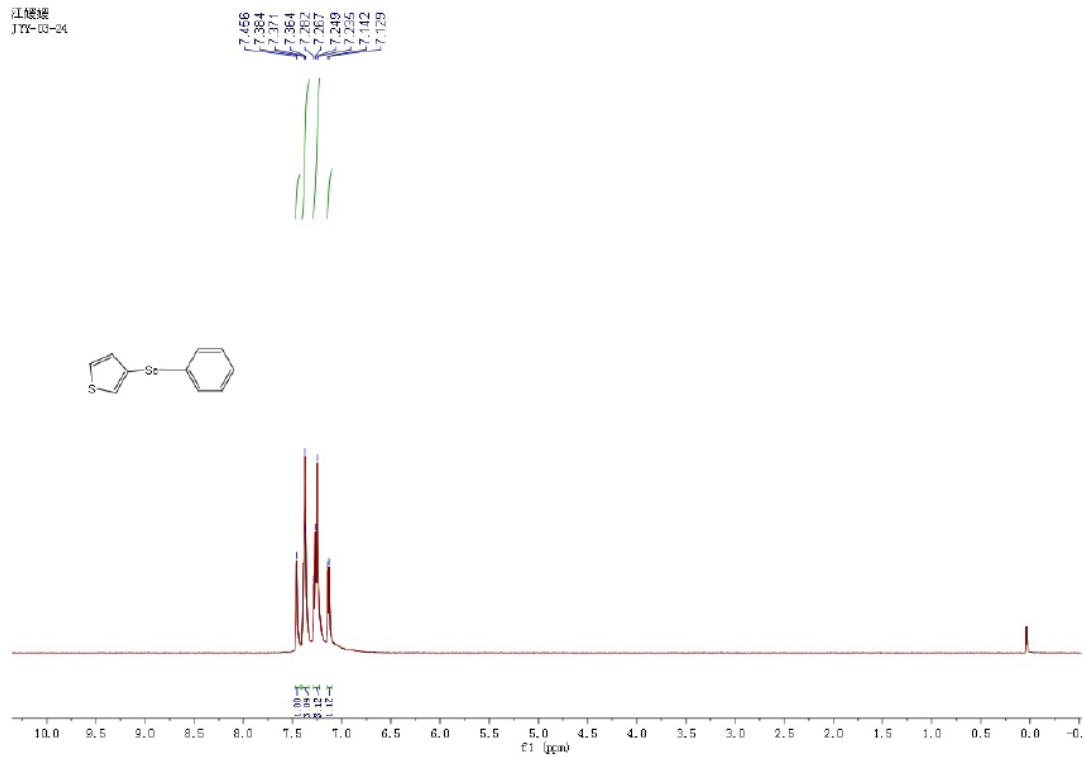

江敏媛  
JYY-03-24

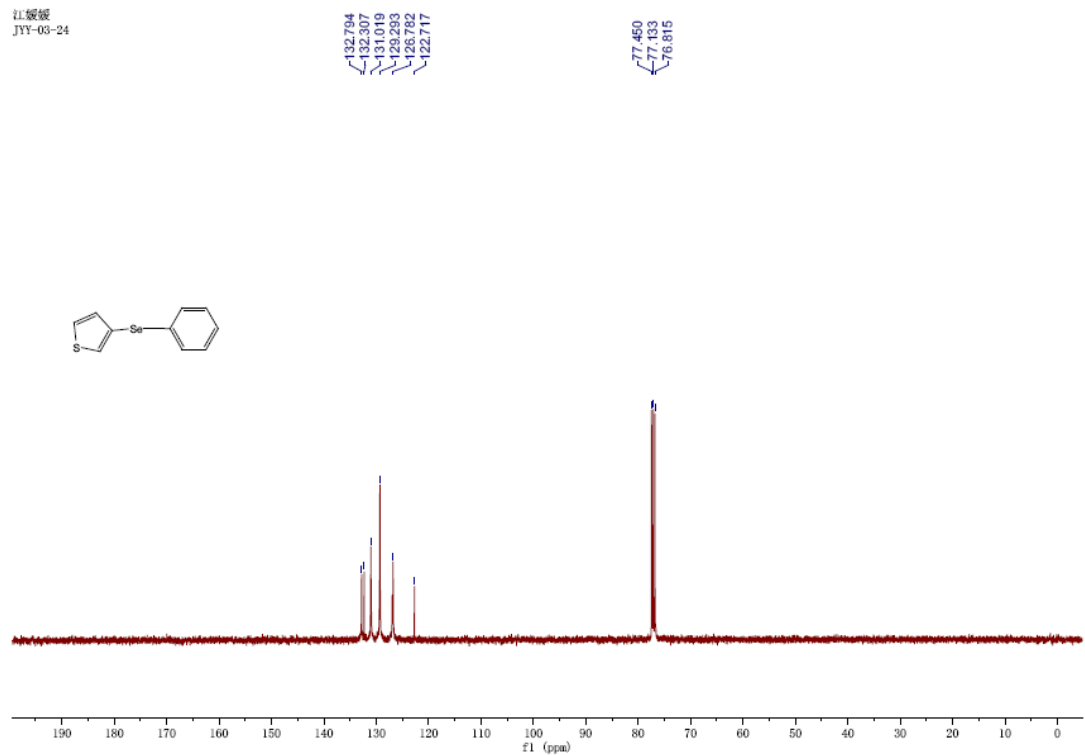

<sup>1</sup>H NMR and <sup>13</sup>C NMR spectra of compound 3p

江耀耀  
JYY-03-17

7.557  
7.552  
7.537  
7.533  
7.322  
7.317  
7.306  
7.300  
7.288  
7.282  
7.252  
7.247  
7.233  
7.188  
7.159  
6.984  
6.854

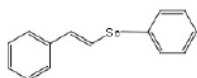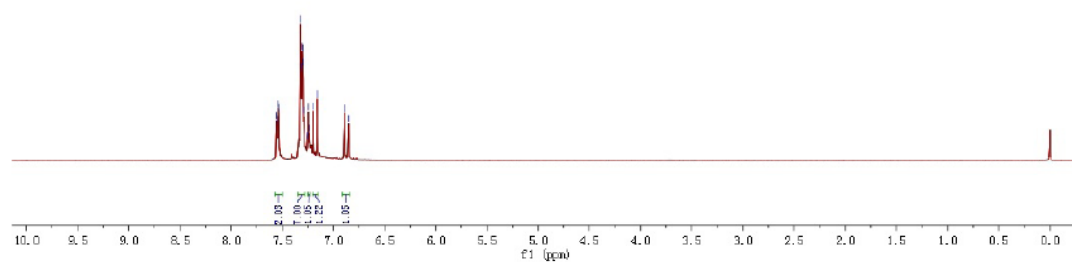

江耀耀  
JYY-03-17

137.047  
135.188  
132.589  
130.186  
129.404  
128.729  
127.705  
127.465  
126.119  
119.489

77.409  
77.082  
76.774

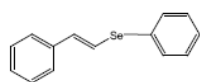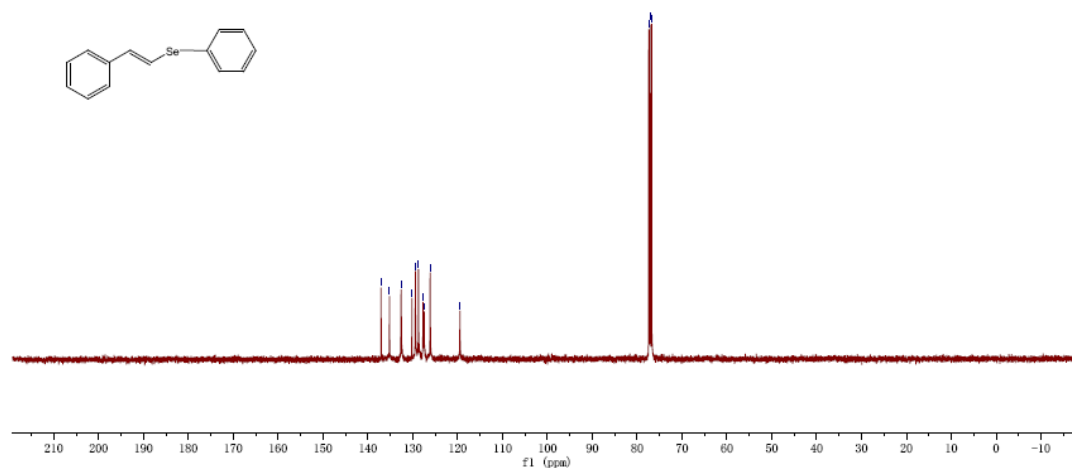

$^1\text{H}$  NMR and  $^{13}\text{C}$  NMR spectra of compound **3q**

江健雄  
JZY-03-26

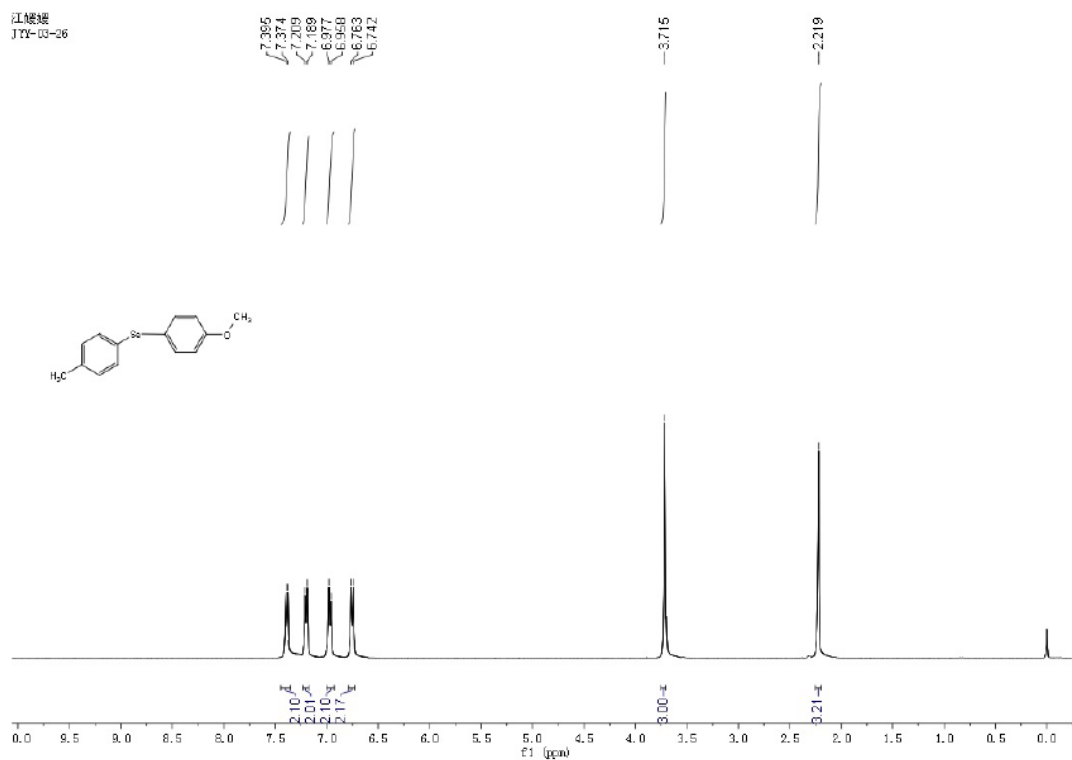

江健雄  
JZY-03-26

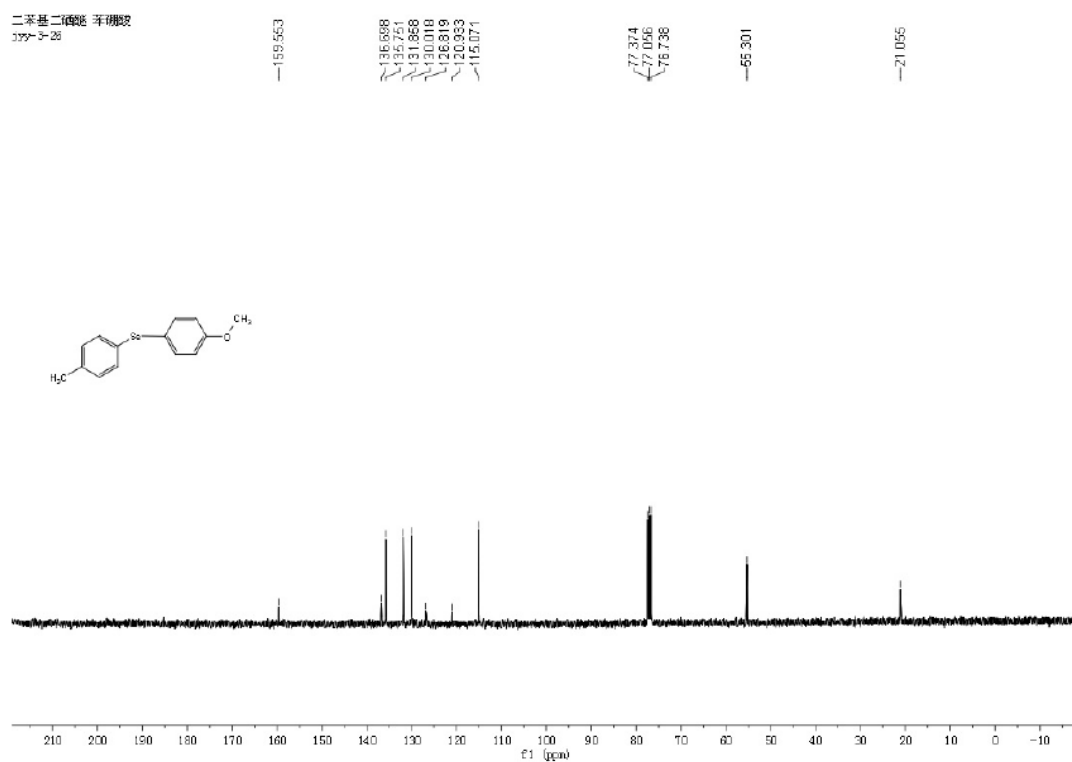

<sup>1</sup>H NMR and <sup>13</sup>C NMR spectra of compound **3r**

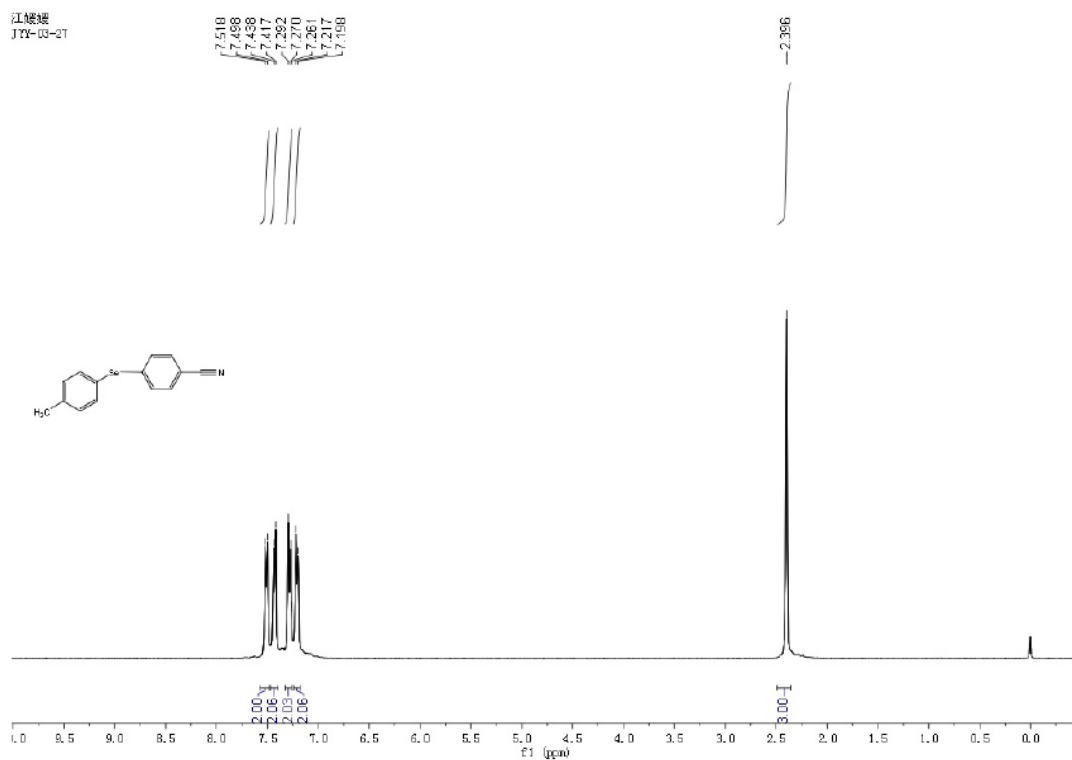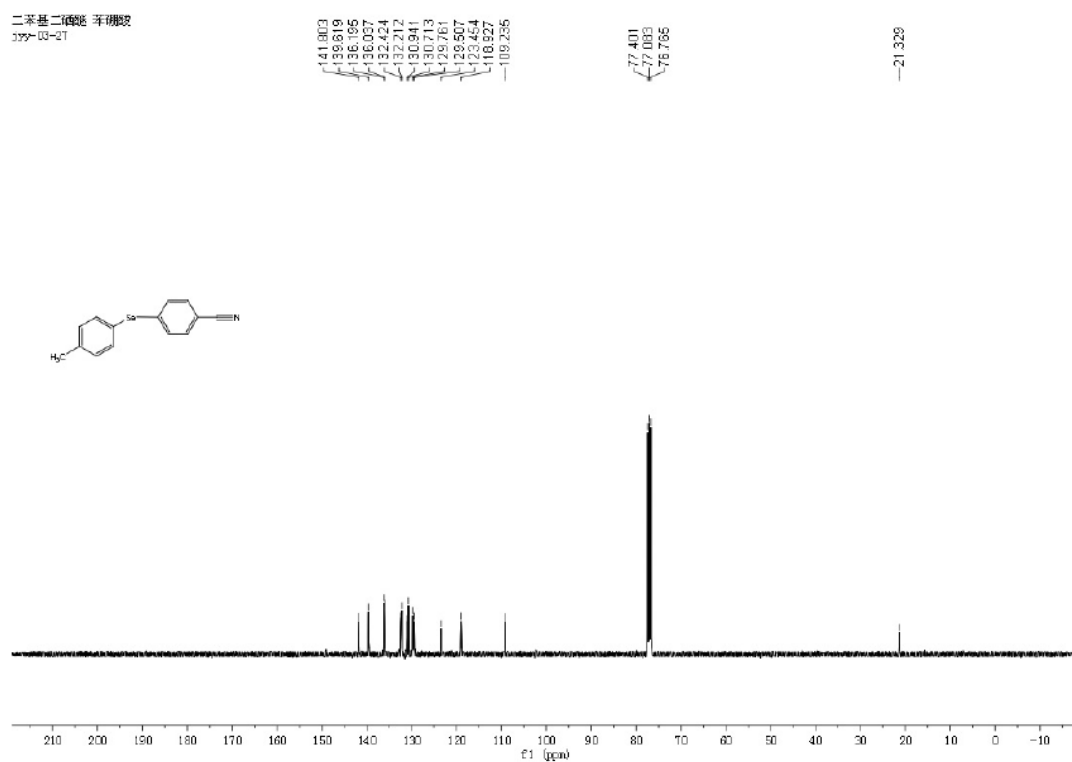

$^1\text{H}$  NMR and  $^{13}\text{C}$  NMR spectra of compound **3s**

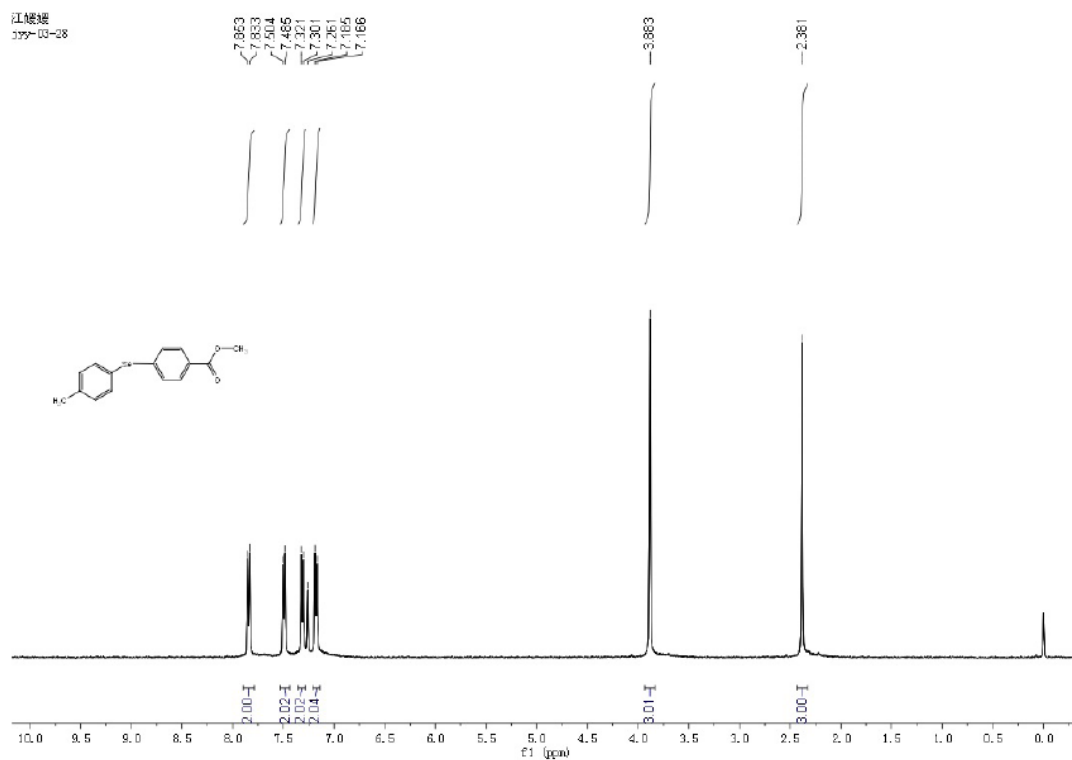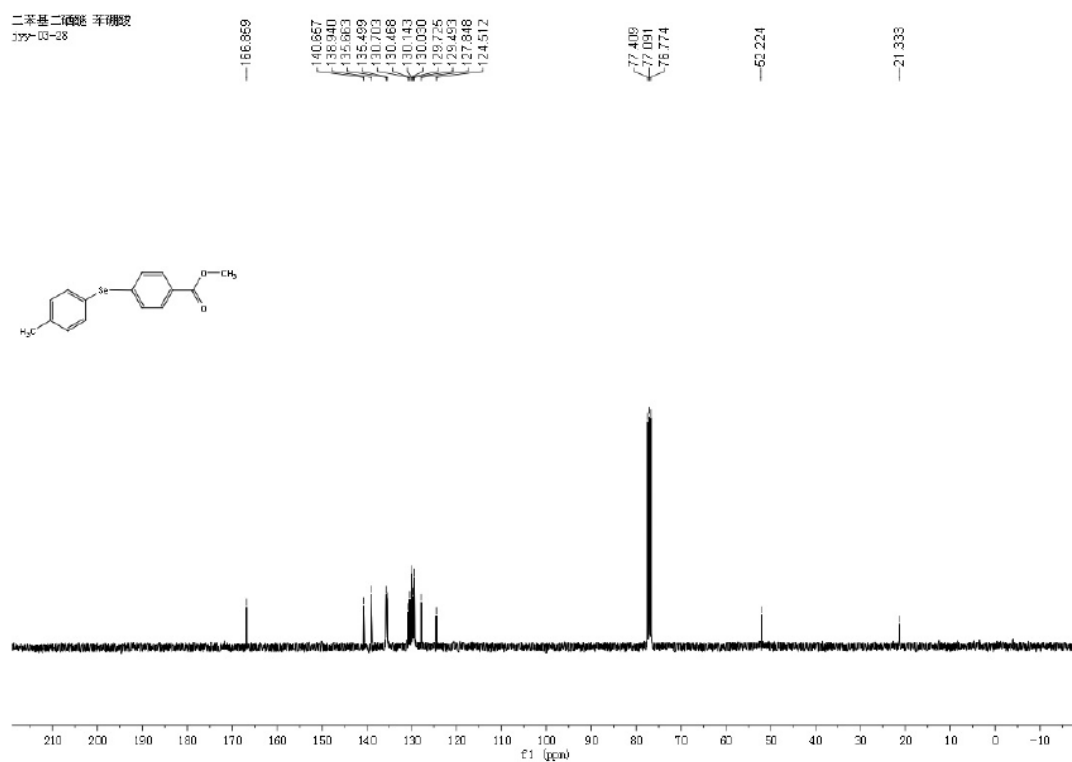

$^1\text{H}$  NMR and  $^{13}\text{C}$  NMR spectra of compound **3t**

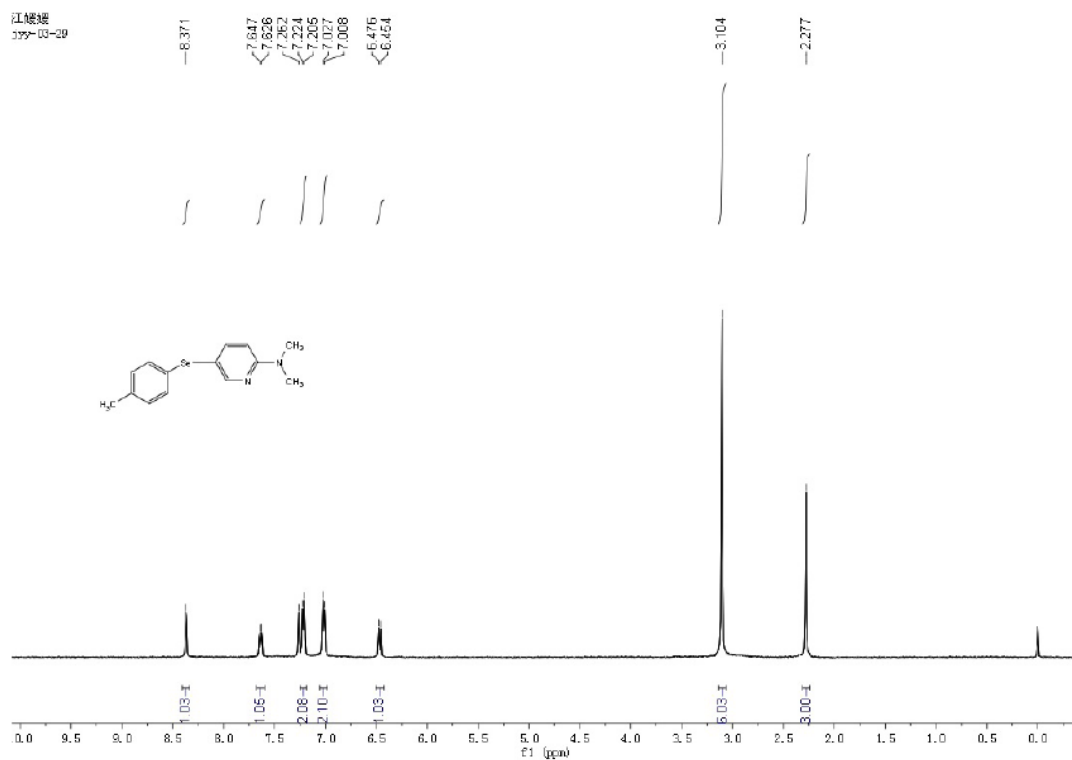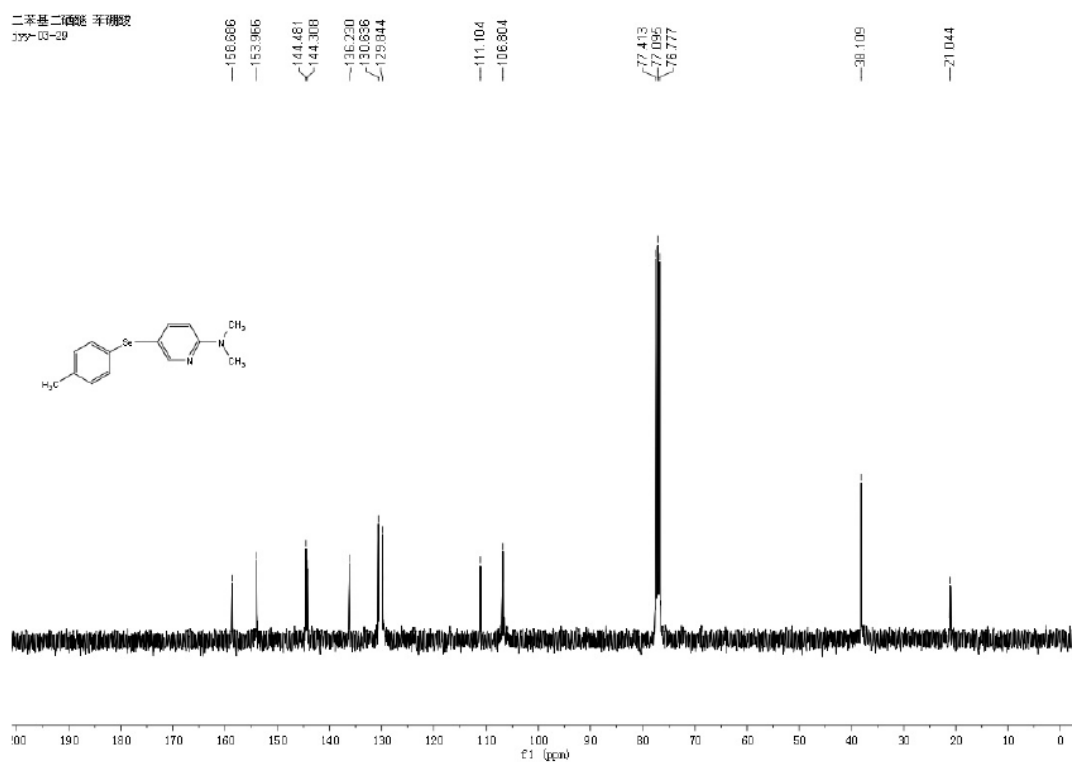

$^1\text{H}$  NMR and  $^{13}\text{C}$  NMR spectra of compound **3u**

二苯基二硫醚 苯磺酸  
322-03-34

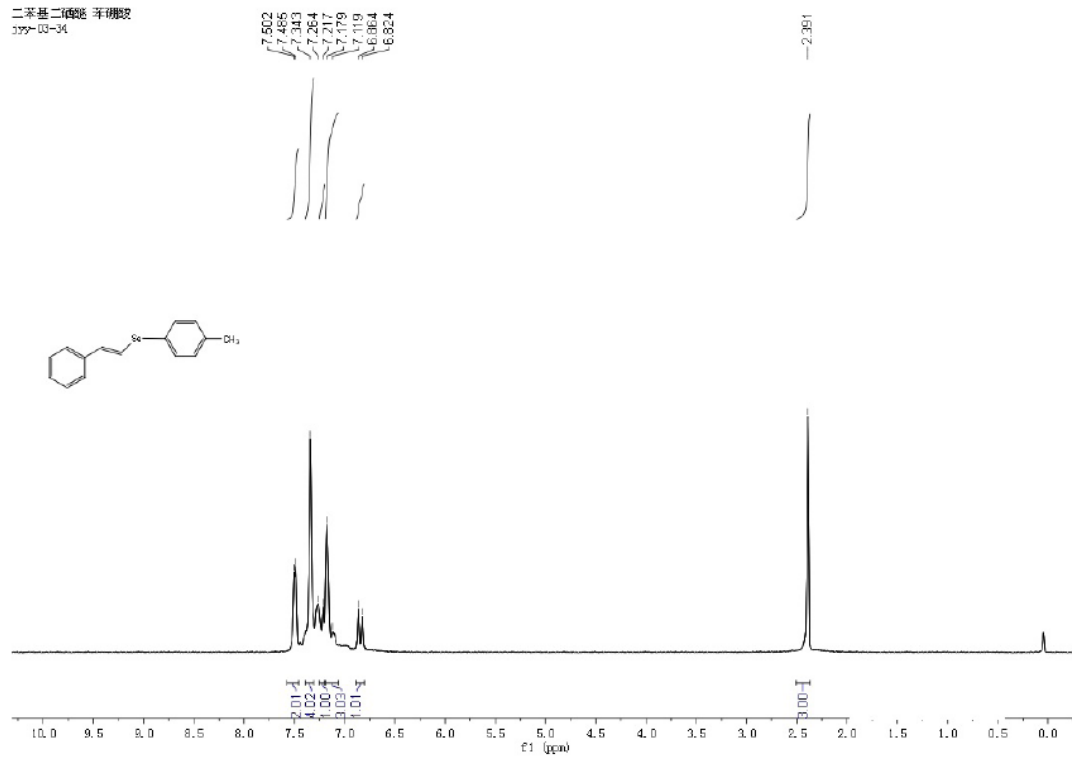

二苯基二硫醚 苯磺酸  
322-03-34

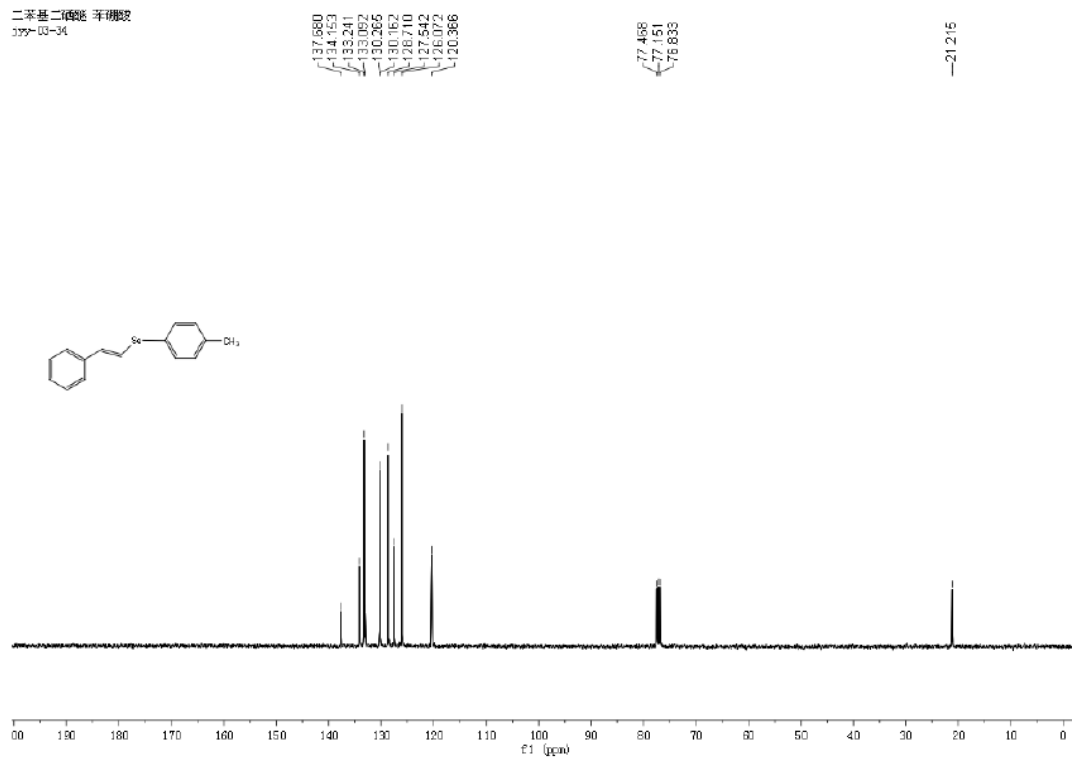

<sup>1</sup>H NMR and <sup>13</sup>C NMR spectra of compound 3v

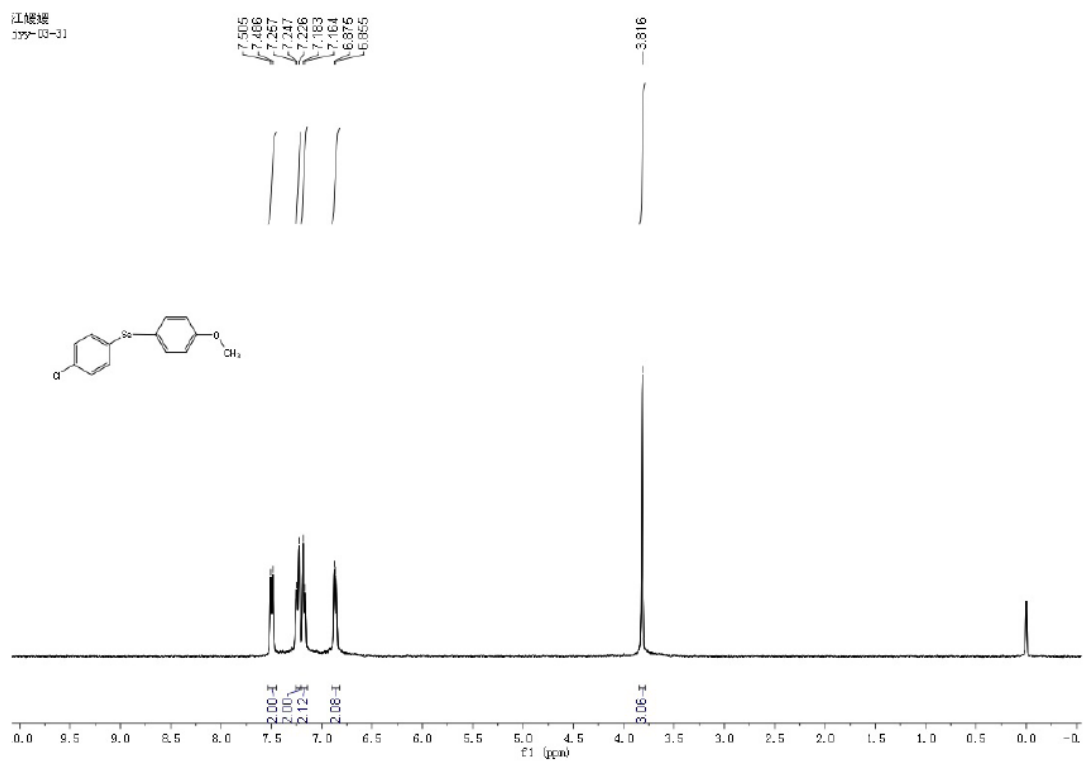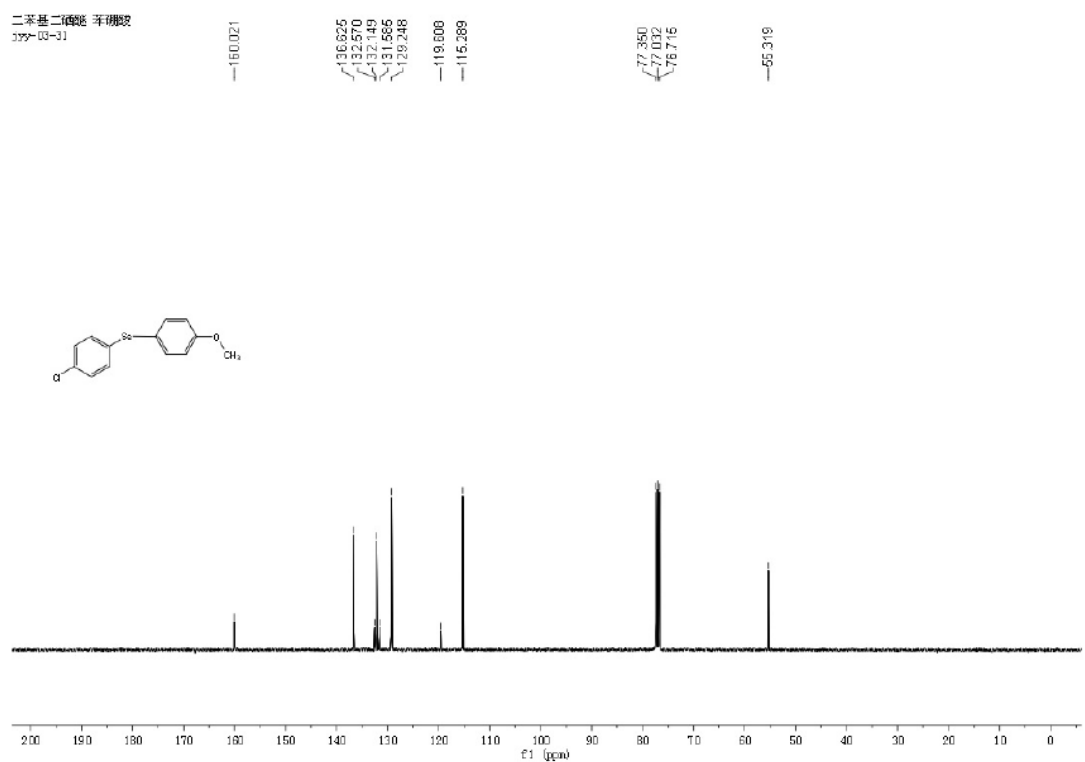

$^1\text{H}$  NMR and  $^{13}\text{C}$  NMR spectra of compound **3w**



江隆建  
jyy-03-32

7.541  
7.520  
7.485  
7.465  
7.369  
7.345  
7.324  
7.264

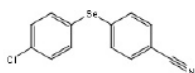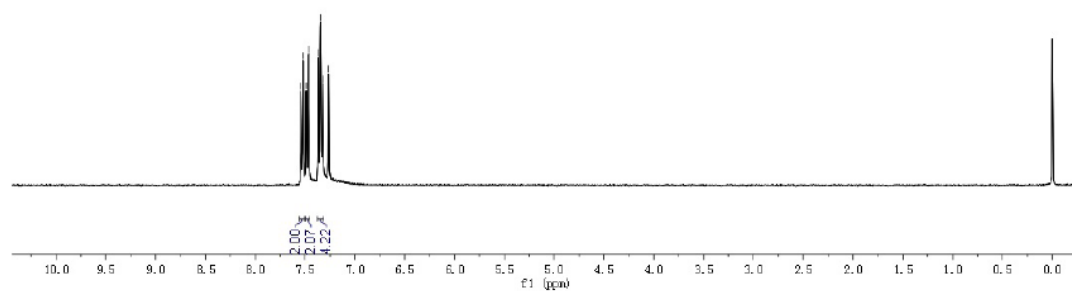

jiangyuanruan  
jyy-03-32

140.148  
136.707  
135.615  
132.523  
130.485  
130.182  
125.865  
118.589  
110.103

77.371  
77.054  
76.736

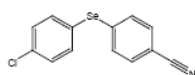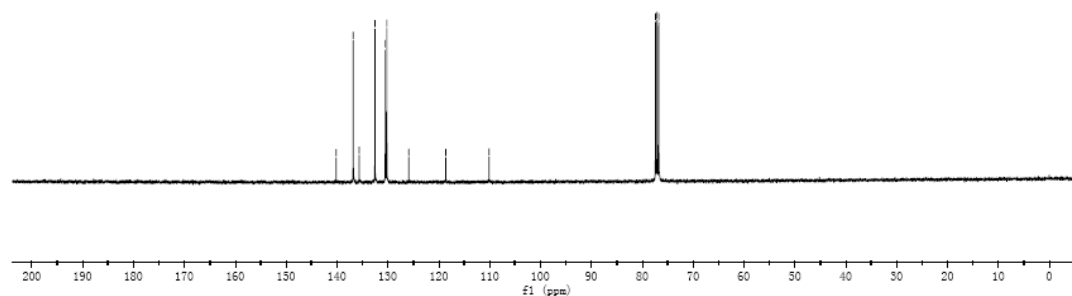

$^1\text{H}$  NMR and  $^{13}\text{C}$  NMR spectra of compound 3x

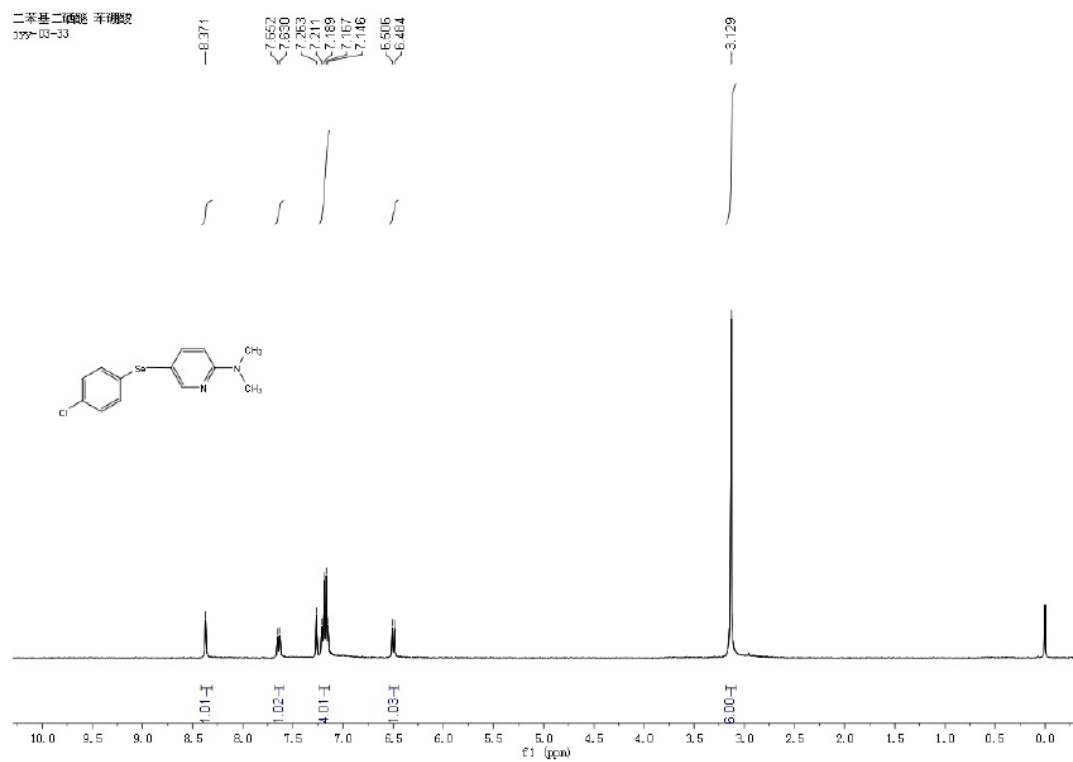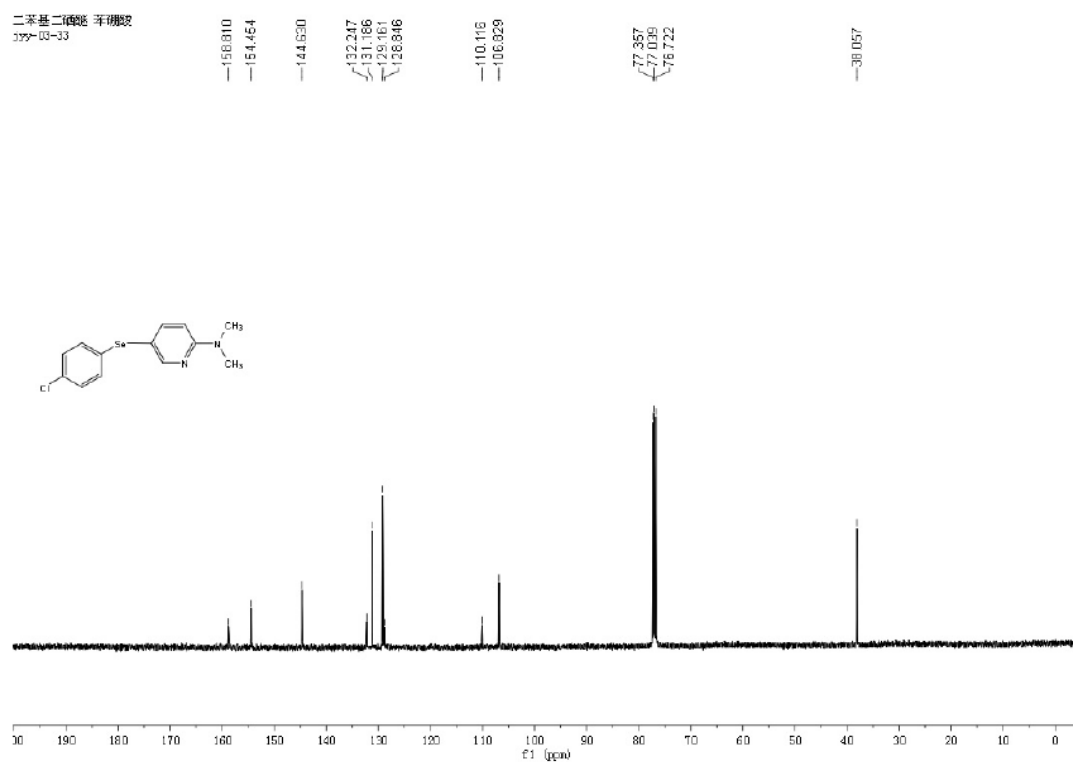

$^1\text{H}$  NMR and  $^{13}\text{C}$  NMR spectra of compound **3y**

二苯基二硫醚 苯硼酸  
jyy-03-36

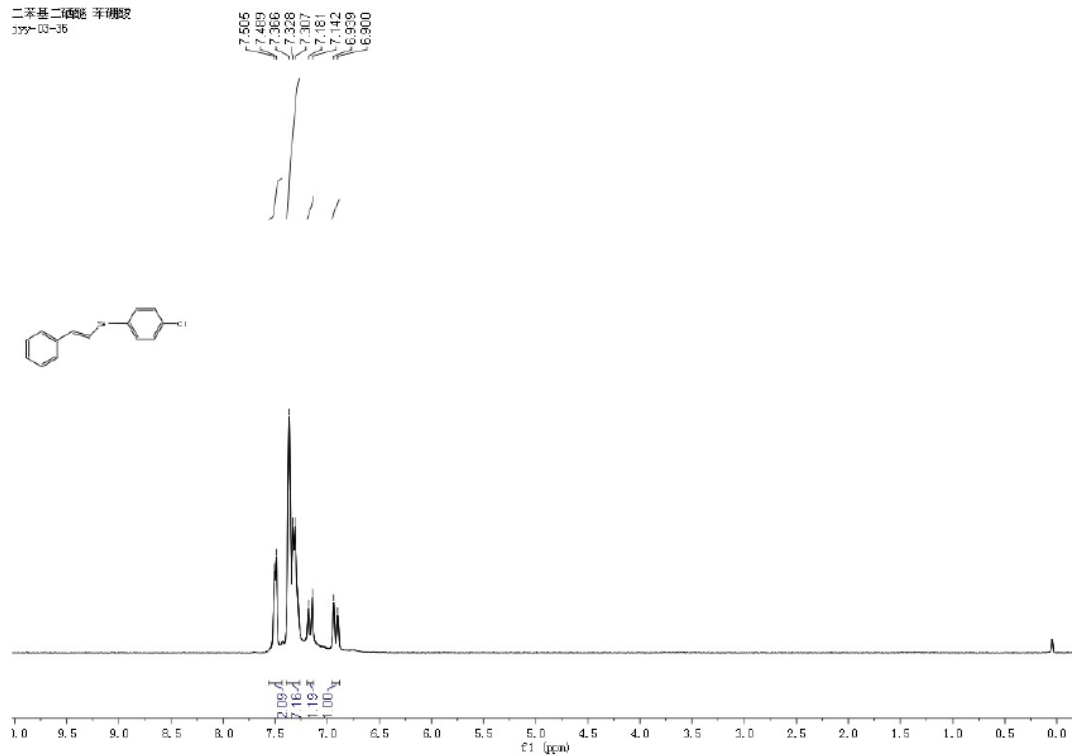

二苯基二硫醚 苯硼酸  
jyy-03-35

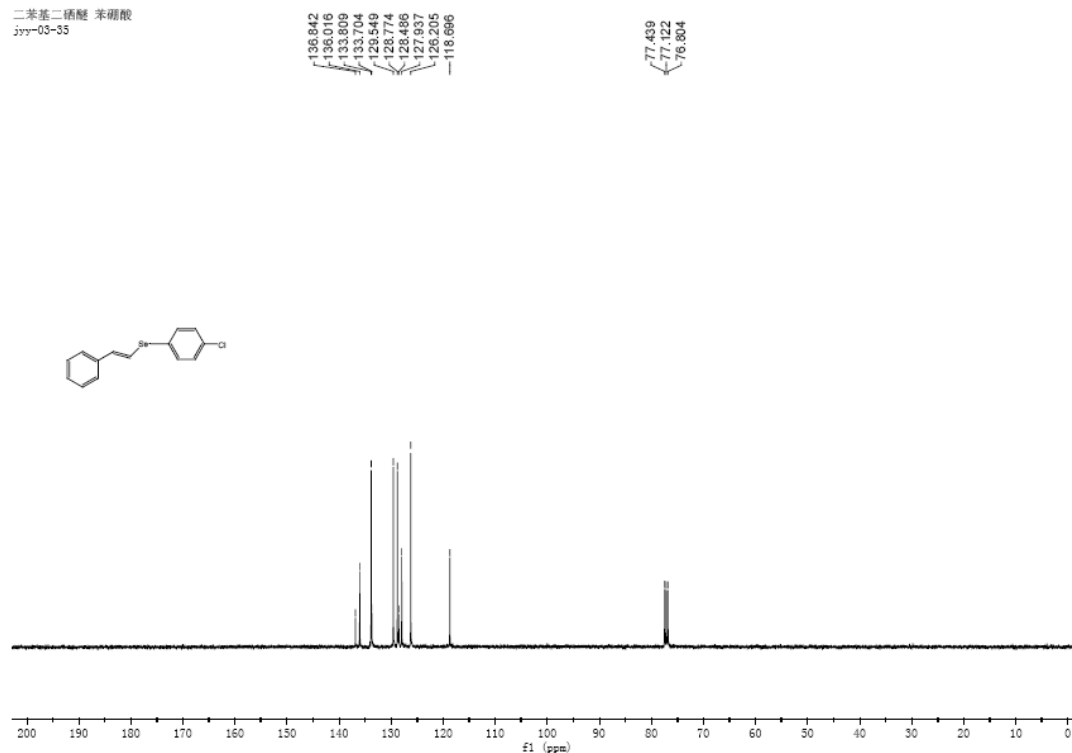

<sup>1</sup>H NMR and <sup>13</sup>C NMR spectra of compound 3z
